# Supplementary material for: Internal electric fields in small water clusters [(H2O)n; n = 2–6]
Source: Royal Society of Chemistry journal article supplement (doi:10.1039/c6cp02803a), 2016-01-01
Supplement: c6cp02803a1.pdf [file c6cp02803a1.pdf]

Electronic Supplementary Information for

## Internal Electric Fields in Small Water Clusters [(H<sub>2</sub>O)<sub>n</sub>; n=2-6]

Saumik Sen,<sup>‡\*a</sup> Manjusha Boda,<sup>‡\*a</sup> S. Venkat Lata<sup>a</sup> and G. Naresh Patwari<sup>\*a</sup>

<sup>a</sup> Department of Chemistry, Indian Institute of Technology Bombay, Powai, Mumbai 400 076 India; E-mail: saumiksen@chem.iitb.ac.in; naresh@chem.iitb.ac.in

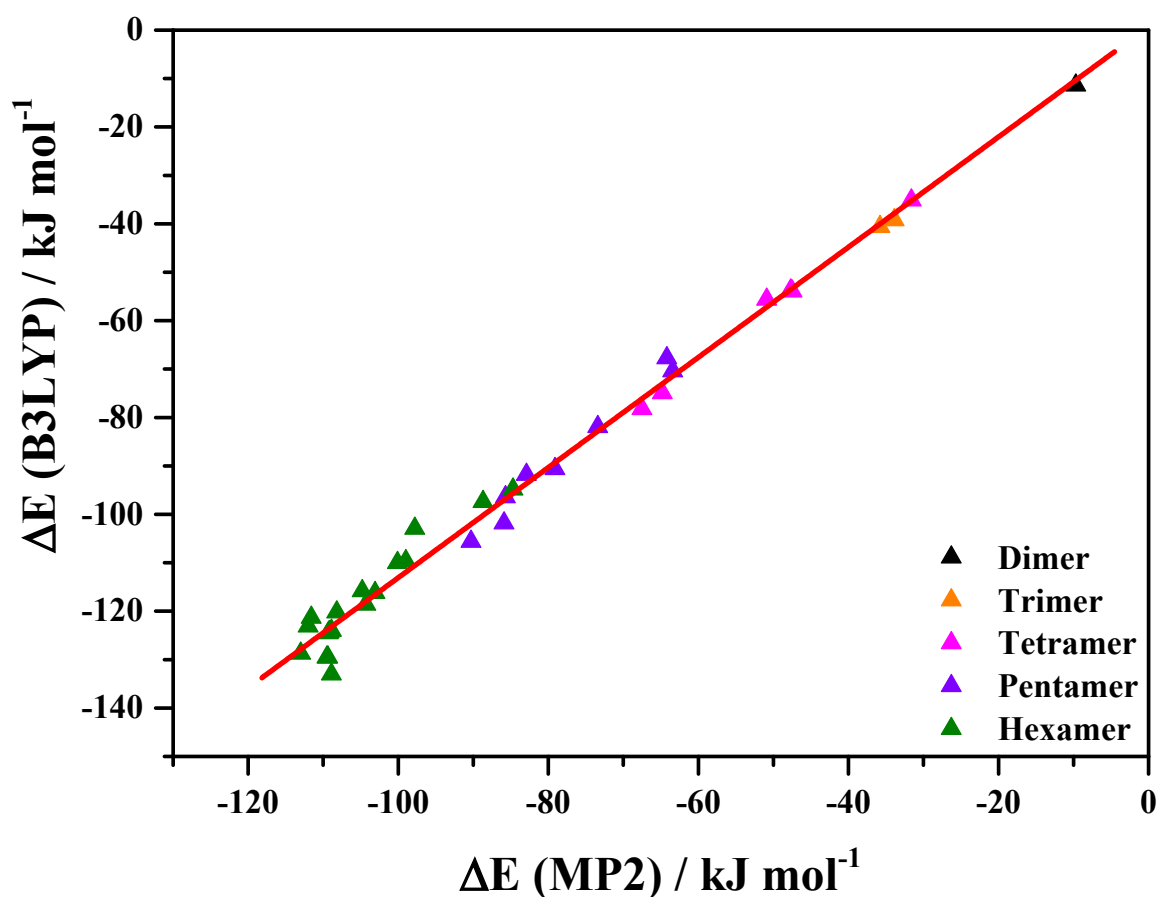

**Fig. S1.** Plot of ZPE and BSSE corrected stabilization energies calculated at B3LYP/6-311++G(*d,p*) against stabilization energies calculated MP2/aug-cc-pVDZ level of theory for various water clusters. The straight-line is a linear fit to the data points ( $R^2 = 0.989$ ). From the slope it can be inferred that the B3LYP/6-311++G(*d,p*) stabilization energies are on the average ~14% higher than the stabilization energies calculated MP2/aug-cc-pVDZ level.

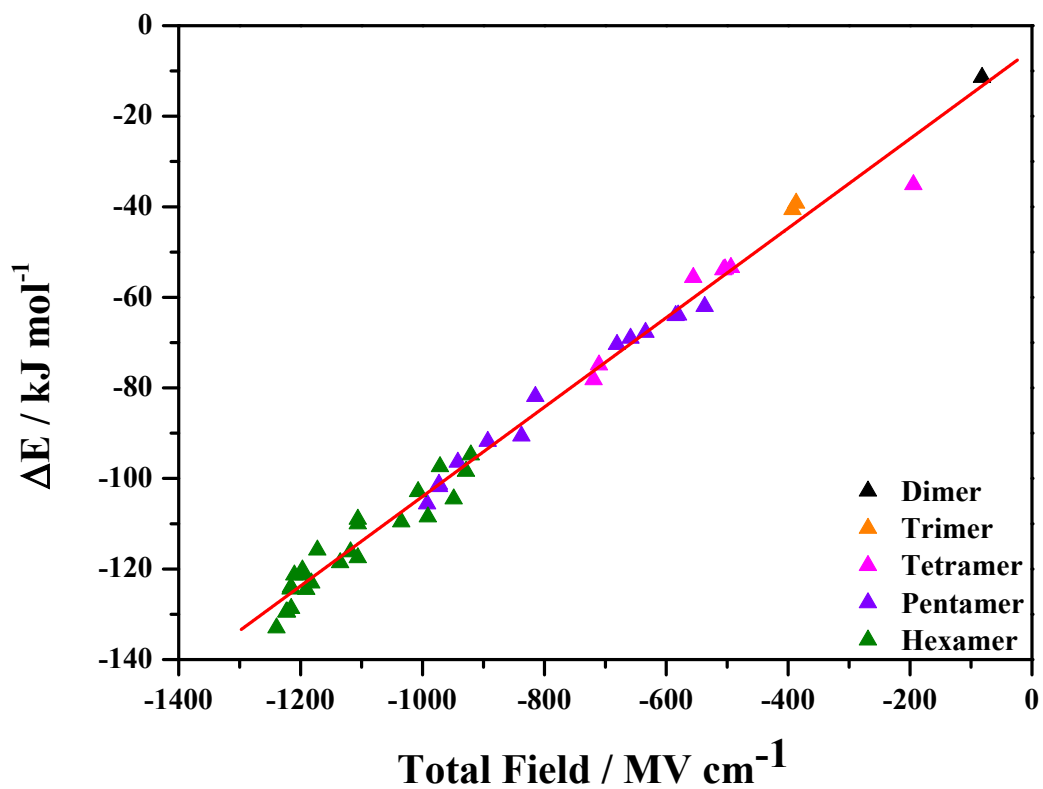

**Fig. S2.** Plot of total stabilization energy against total electric field calculated at B3LYP/6-311++G(*d,p*) level for several water clusters. The straight line is a linear fit ( $R^2 = 0.988$ ) to the data points.

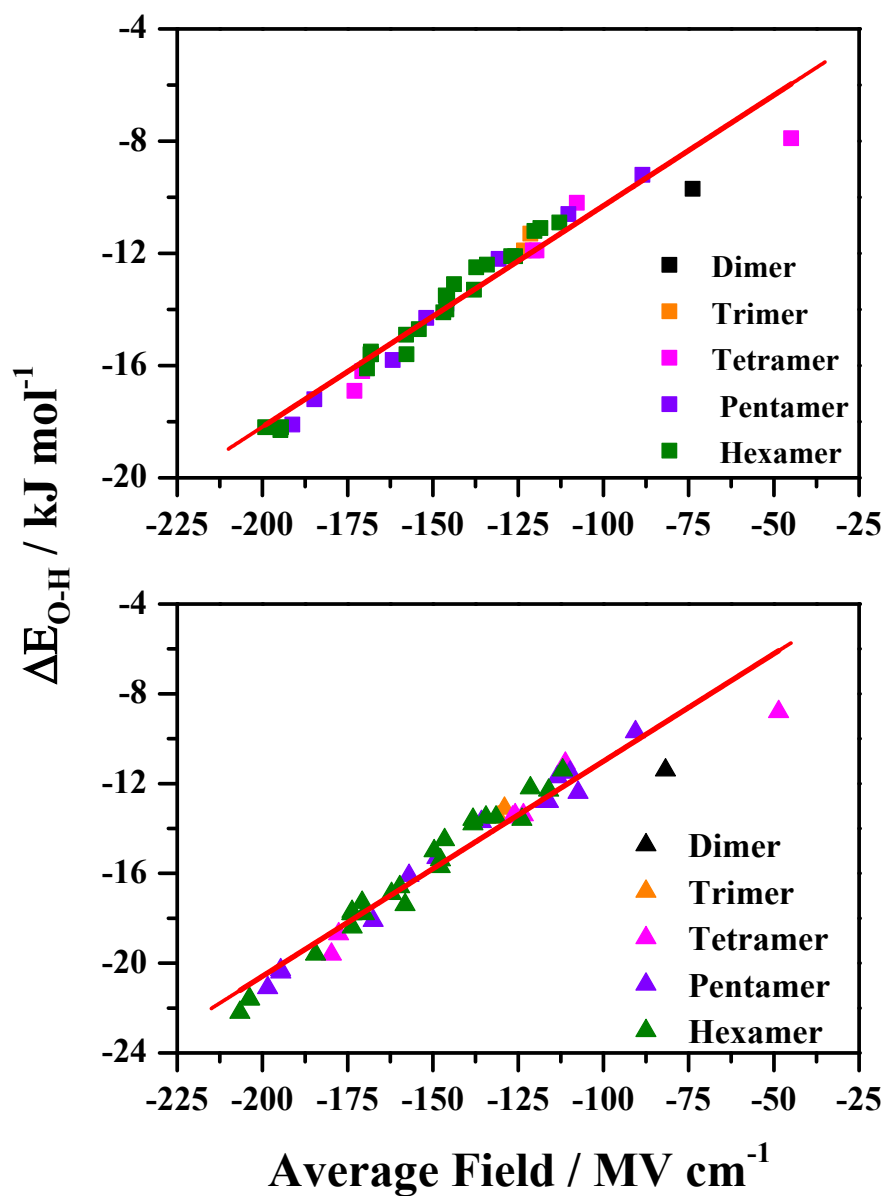

**Fig. S3.** Plot of average hydrogen bond stabilization energy against average electric field calculated at MP2/aug-cc-pVDZ (squares) and at B3LYP/6-311++G(*d,p*) (triangles) levels for several water clusters. The straight lines are linear fits to the data points with  $R^2$  values of 0.951 and 0.949, respectively.

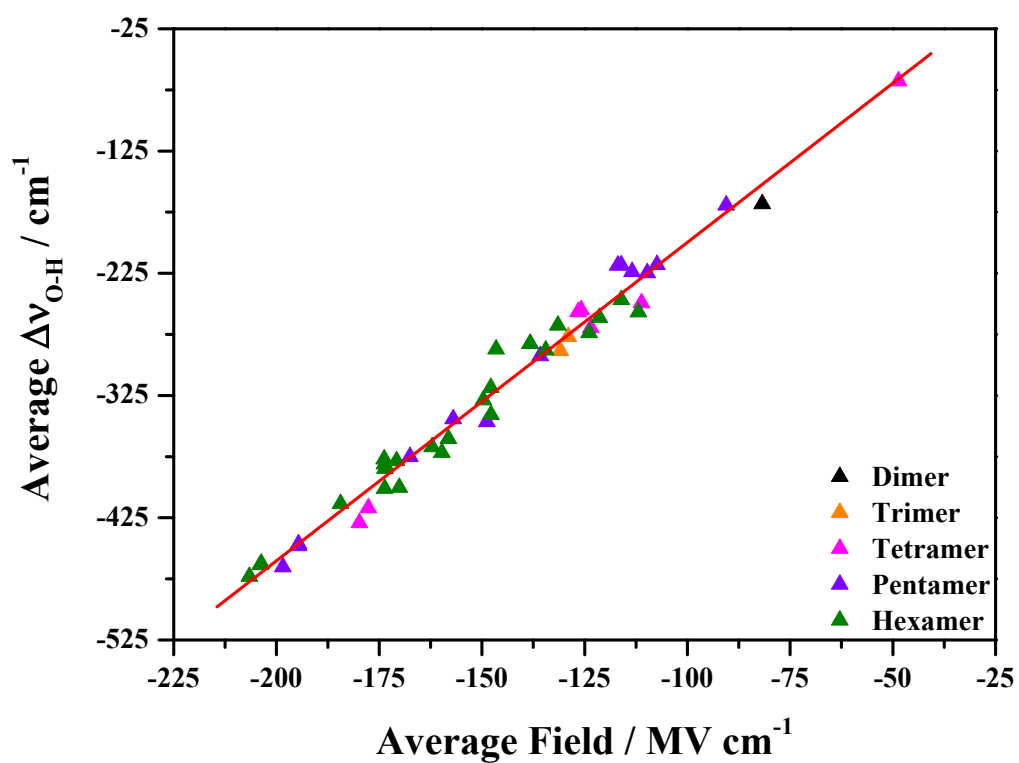

**Fig. S4.** Plot of average red-shift in the O–H stretching frequencies against average electric field calculated at B3LYP/6-311++G(*d,p*) level for several water clusters. The straight line is a linear fit ( $R^2 = 0.979$ ) to the data points, which corresponds to the Stark tuning rate of  $2.60 \text{ cm}^{-1}/(\text{MV cm}^{-1})$ .

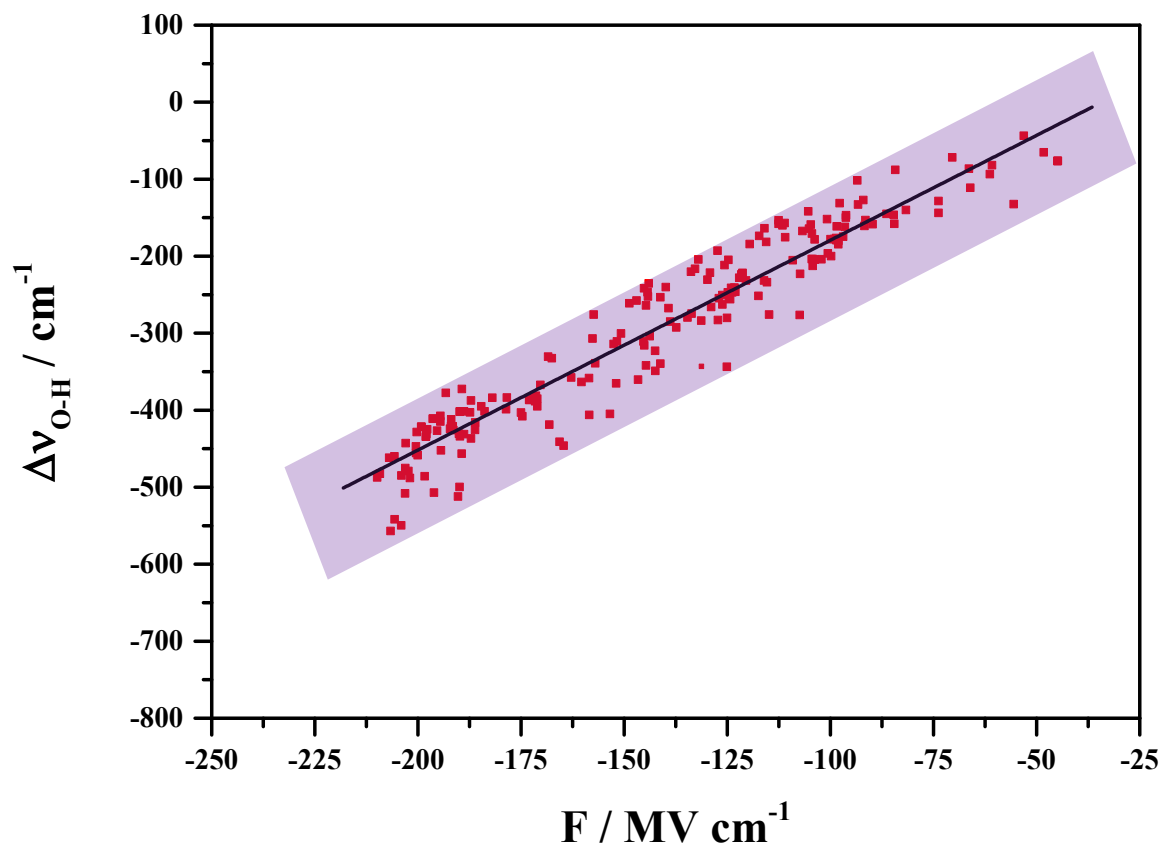

**Figure S5.** Plot of red-shift in the O–H stretching frequencies against the corresponding electric field calculated at MP2/aug-cc-pVDZ level for several water clusters. The shaded region indicates linear trend. The straight line is a linear fit to data points (206) with  $R^2$  value of 0.921 and residuals within  $\pm 100$  cm<sup>-1</sup>. The corresponding Stark tuning rate is 2.72 cm<sup>-1</sup>/(MV cm<sup>-1</sup>).

**Table S1. Unscaled vibrational frequencies ( $\text{cm}^{-1}$ ) for free and hydrogen bonded O–H groups and the electric fields ( $\text{MV cm}^{-1}$ ) produced at hydrogen bonded O–H group for the water clusters  $W_n$  ( $n = 2-6$ ) calculated at various levels of theory. Vibrational frequencies listed in Columns (a) and (b) are the selectively labelled hydrogen bonded O–H group in the deuterated water cluster and O–D group in the water cluster**

| Structure | MP2/aug-cc-pVDZ                |                                  |                                         |                                         | Elec. Field | B3LYP/6-311++G(d,p)            |                                  |             |
|-----------|--------------------------------|----------------------------------|-----------------------------------------|-----------------------------------------|-------------|--------------------------------|----------------------------------|-------------|
|           | $\nu_{\text{O-H}} \text{free}$ | $\nu_{\text{O-H}} \text{H-bond}$ | $\nu_{\text{O-H}} \text{H-bond}$<br>(a) | $\nu_{\text{O-D}} \text{H-bond}$<br>(b) |             | $\nu_{\text{O-H}} \text{free}$ | $\nu_{\text{O-H}} \text{H-bond}$ | Elec. Field |
| W         | 3875                           |                                  |                                         |                                         |             |                                |                                  |             |
|           | 2811 (O–D)                     |                                  |                                         |                                         |             |                                |                                  |             |
| W2        | 3926                           | 3704                             | 3731                                    | 2707                                    | -73.79      | 3915                           | 3706                             | -81.79      |
|           | 3904                           |                                  |                                         |                                         |             | 3893                           |                                  |             |
|           | 3797                           |                                  |                                         |                                         |             | 3815                           |                                  |             |
| W3_1      | 3896                           | 3641                             | 3633                                    | 2636                                    | -124.07     | 3895                           | 3630                             | -131.83     |
|           | 3894                           | 3632                             | 3628                                    | 2632                                    | -123.76     | 3893                           | 3619                             | -131.23     |
|           | 3890                           | 3574                             | 3647                                    | 2646                                    | -122.08     | 3888                           | 3561                             | -129.66     |
| W3_2      | 3900                           | 3649                             | 3651                                    | 2649                                    | -121.57     | 3901                           | 3641                             | -129.06     |
|           | 3899                           | 3648                             | 3652                                    | 2650                                    | -121.33     | 3899                           | 3640                             | -128.98     |
|           | 3899                           | 3596                             | 3653                                    | 2651                                    | -121.27     | 3899                           | 3587                             | -128.96     |
| W4_1      | 3886                           | 3524                             | 3488                                    | 2530                                    | -173.01     | 3886                           | 3508                             | -179.82     |
|           | 3885                           | 3486                             | 3488                                    | 2530                                    | -173.00     | 3885                           | 3471                             | -179.80     |
|           | 3885                           | 3486                             | 3488                                    | 2530                                    | -173.00     | 3885                           | 3470                             | -179.78     |
|           | 3884                           | 3396                             | 3488                                    | 2530                                    | -172.99     | 3885                           | 3377                             | -179.73     |
| W4_2      | 3888                           | 3532                             | 3490                                    | 2531                                    | -171.06     | 3889                           | 3520                             | -178.09     |
|           | 3887                           | 3505                             | 3490                                    | 2531                                    | -171.06     | 3889                           | 3493                             | -178.07     |
|           | 3887                           | 3488                             | 3507                                    | 2545                                    | -170.31     | 3888                           | 3476                             | -177.17     |
|           | 3886                           | 3409                             | 3507                                    | 2545                                    | -170.30     | 3887                           | 3396                             | -177.15     |
| W4_3      | 3902                           | 3779                             | 3434                                    | 2491                                    | -165.66     | 3896                           | 3757                             | -167.24     |
|           | 3894                           | 3708                             | 3707                                    | 2691                                    | -106.79     | 3892                           | 3704                             | -107.69     |
|           | 3885                           | 3686                             | 3748                                    | 2720                                    | -91.99      | 3883                           | 3683                             | -98.89      |
|           |                                | 3675                             | 3716                                    | 2696                                    | -89.75      |                                | 3681                             | -92.71      |
|           |                                | 3410                             | 3728                                    | 2705                                    | -84.64      |                                | 3381                             | -89.11      |

|             |      |       |      |         |         |      |        |         |
|-------------|------|-------|------|---------|---------|------|--------|---------|
| <b>W4_4</b> | 3927 | 3765  | 3533 | 2564    | -144.67 | 3919 | 3743   | -151.73 |
|             | 3895 | 3663  | 3623 | 2629    | -117.42 | 3892 | 3670   | -124.55 |
|             | 3886 | 3610  | 3718 | 2699    | -111.07 | 3886 | 3595   | -117.81 |
|             | 3798 | 3504  | 3710 | 2693    | -105.17 | 3817 | 3486   | -109.41 |
| <b>W4_5</b> | 3927 | 3763  | 3514 | 2550    | -146.63 | 3920 | 3739   | -152.09 |
|             | 3899 | 36634 | 3711 | 2694    | -115.97 | 3894 | 3669   | -122.57 |
|             | 3888 | 3623  | 3641 | 2642    | -115.36 | 3890 | 3610   | -121.77 |
|             | 3798 | 3488  | 3716 | 2697    | -104.76 | 3817 | 3478   | -109.86 |
| <b>W4_6</b> | 3924 | 3863  | 3798 | 2757    | -44.94  | 3908 | 3842   | -48.69  |
|             | 3924 | 3838  | 3798 | 2757    | -44.91  | 3907 | 3815   | -48.69  |
|             | 3796 | 3745  | 3798 | 2757    | -44.83  | 3809 | 3753   | -48.55  |
|             | 3793 | 3737  | 3798 | 2757    | -44.83  | 3803 | 3745   | -48.47  |
| <b>W4_7</b> |      |       |      |         |         | 3895 | 3691   | -169.77 |
|             |      |       |      |         |         | 3890 | 3669   | -132.61 |
|             |      |       |      |         |         | 3886 | 3623   | -108.65 |
|             |      |       |      |         |         | 3873 | 3483   | -82.81  |
| <b>W5_1</b> | 3889 | 3494  | 3450 | 2503    | -192.20 | 3890 | 3478   | -199.14 |
|             | 3887 | 3487  | 3454 | 2505    | -191.98 | 3889 | 3467   | -199.03 |
|             | 3887 | 3442  | 3454 | 2505    | -191.54 | 3886 | 3422   | -198.70 |
|             | 3885 | 3433  | 3449 | 2502    | -191.38 | 3884 | 3412   | -198.34 |
|             | 3883 | 3354  | 3473 | 2520    | -188.83 | 3883 | 3327   | -197.00 |
| <b>W5_2</b> | 3893 | 3515  | 3444 | 2498    | -190.06 | 3898 | 3498   | -198.04 |
|             | 3892 | 3496  | 3472 | 2519    | -187.35 | 3895 | 3484   | -196.20 |
|             | 3890 | 3464  | 3459 | 2509    | -186.09 | 3892 | 3450   | -194.58 |
|             | 3880 | 3439  | 3491 | 2533    | -181.97 | 3883 | 3424   | -192.76 |
|             | 3879 | 3371  | 3491 | 2533    | -178.45 | 3882 | 3353   | -191.26 |
| <b>W5_3</b> | 3899 | 3771  | 3423 | 2483    | -194.40 | 3895 | 3757   | -198.62 |
|             | 3886 | 3698  | 3441 | 2496    | -189.79 | 3887 | 3694   | -195.03 |
|             | 3884 | 3647  | 3418 | 2480    | -189.39 | 3886 | 3628   | -192.33 |
|             | 3883 | 3462  | 3732 | 2710    | -129.03 | 3884 | 3448   | -140.81 |
|             |      | 3419  | 3733 | 2710    | -105.36 |      | 3403   | -115.62 |
|             | 3351 | 3670  | 2663 | -103.75 |         | 3334 | -99.56 |         |

|             |      |      |      |      |         |      |      |         |
|-------------|------|------|------|------|---------|------|------|---------|
| <b>W5_4</b> | 3899 | 3714 | 3325 | 2410 | -204.05 | 3898 | 3695 | -204.32 |
|             | 3890 | 3666 | 3389 | 2458 | -198.37 | 3890 | 3669 | -203.24 |
|             | 3886 | 3634 | 3658 | 2656 | -132.78 | 3889 | 3640 | -135.01 |
|             | 3882 | 3627 | 3682 | 2673 | -127.37 | 3883 | 3628 | -130.91 |
|             |      | 3392 | 3670 | 2662 | -109.11 |      | 3368 | -112.26 |
|             |      | 3281 | 3671 | 2663 | -104.50 |      | 3261 | -107.00 |
| <b>W5_5</b> | 3927 | 3730 | 3368 | 2442 | -196.09 | 3920 | 3721 | -201.76 |
|             | 3887 | 3565 | 3467 | 2514 | -174.66 | 3887 | 3563 | -182.01 |
|             | 3885 | 3506 | 3511 | 2547 | -160.34 | 3886 | 3492 | -166.94 |
|             | 3882 | 3451 | 3568 | 2590 | -157.66 | 3884 | 3431 | -160.65 |
|             | 3797 | 3328 | 3718 | 2699 | -120.17 | 3817 | 3310 | -126.31 |
| <b>W5_6</b> | 3894 | 3682 | 3628 | 2634 | -144.32 | 3893 | 3652 | -147.56 |
|             | 3893 | 3636 | 3628 | 2634 | -144.32 | 3893 | 3628 | -147.56 |
|             | 3893 | 3621 | 3620 | 2626 | -124.60 | 3892 | 3615 | -130.00 |
|             | 3892 | 3621 | 3620 | 2626 | -124.60 | 3890 | 3608 | -130.00 |
|             |      | 3576 | 3634 | 2636 | -123.24 |      | 3562 | -129.79 |
|             |      | 3540 | 3634 | 2636 | -123.24 |      | 3534 | -129.78 |
| <b>W5_7</b> | 3916 | 3830 | 3470 | 2517 | -153.44 | 3902 | 3816 | -154.62 |
|             | 3886 | 3808 | 3695 | 2683 | -98.10  | 3884 | 3787 | -99.53  |
|             | 3787 | 3743 | 3695 | 2683 | -98.09  | 3796 | 3729 | -99.53  |
|             |      | 3713 | 3746 | 2720 | -73.78  |      | 3721 | -75.50  |
|             |      | 3693 | 3746 | 2720 | -73.78  |      | 3695 | -75.50  |
|             |      | 3653 | 3781 | 2745 | -61.34  |      | 3663 | -64.63  |
|             |      | 3445 | 3781 | 2745 | -61.33  |      | 3428 | -64.63  |
|             |      |      |      |      |         |      |      |         |
| <b>W5_8</b> | 3928 | 3785 | 3526 | 2560 | -142.45 | 3919 | 3756 | -144.52 |
|             | 3903 | 3722 | 3708 | 2693 | -129.14 | 3894 | 3705 | -137.46 |
|             | 3897 | 3685 | 3678 | 2669 | -100.59 | 3885 | 3685 | -108.00 |
|             | 3799 | 3665 | 3675 | 2666 | -99.83  | 3817 | 3650 | -103.15 |
|             |      | 3644 | 3728 | 2706 | -96.19  |      | 3623 | -97.27  |
|             |      | 3497 | 3742 | 2716 | -93.27  |      | 3514 | -90.30  |
| <b>W5_9</b> |      |      |      |      |         | 3899 | 3502 | -197.83 |
|             |      |      |      |      |         | 3895 | 3483 | -196.27 |



|              |      |      |      |      |         |      |      |         |
|--------------|------|------|------|------|---------|------|------|---------|
|              |      |      |      |      |         | 3893 | 3450 | -196.05 |
|              |      |      |      |      |         | 3883 | 3428 | -191.62 |
|              |      |      |      |      |         | 3879 | 3354 | -191.36 |
| <b>W5_10</b> |      |      |      |      |         | 3917 | 3791 | -160.34 |
|              |      |      |      |      |         | 3889 | 3741 | -121.39 |
|              |      |      |      |      |         | 3885 | 3688 | -115.03 |
|              |      |      |      |      |         | 3816 | 3670 | -97.20  |
|              |      |      |      |      |         |      | 3629 | -94.08  |
|              |      |      |      |      |         |      | 3392 | -70.68  |
| <b>W5_11</b> |      |      |      |      |         | 3920 | 3751 | -140.48 |
|              |      |      |      |      |         | 3918 | 3745 | -129.92 |
|              |      |      |      |      |         | 3892 | 3668 | -106.32 |
|              |      |      |      |      |         | 3818 | 3593 | -104.57 |
|              |      |      |      |      |         | 3816 | 3515 | -103.38 |
| <b>W5_12</b> |      |      |      |      |         | 3918 | 3756 | -143.70 |
|              |      |      |      |      |         | 3916 | 3739 | -127.46 |
|              |      |      |      |      |         | 3887 | 3667 | -104.50 |
|              |      |      |      |      |         | 3817 | 3613 | -102.74 |
|              |      |      |      |      |         | 3815 | 3487 | -102.11 |
| <b>W5_13</b> |      |      |      |      |         | 3895 | 3764 | -144.27 |
|              |      |      |      |      |         | 3895 | 3737 | -127.12 |
|              |      |      |      |      |         | 3894 | 3667 | -113.99 |
|              |      |      |      |      |         | 3886 | 3600 | -95.12  |
|              |      |      |      |      |         | 3803 | 3515 | -56.50  |
| <b>W6_1</b>  | 3889 | 3735 | 3362 | 2439 | -214.12 | 3888 | 3724 | -218.11 |
|              | 3886 | 3586 | 3390 | 2458 | -203.99 | 3887 | 3582 | -208.45 |
|              | 3885 | 3570 | 3367 | 2441 | -203.10 | 3887 | 3564 | -206.27 |
|              | 3882 | 3516 | 3577 | 2598 | -167.42 | 3885 | 3506 | -173.10 |
|              | 3877 | 3415 | 3574 | 2593 | -150.76 | 3876 | 3399 | -156.19 |
|              |      | 3362 | 3559 | 2582 | -145.13 |      | 3344 | -153.18 |
|              |      | 3286 | 3723 | 2702 | -100.82 |      | 3266 | -100.22 |
| <b>W6_2</b>  | 3895 | 3762 | 3255 | 2359 | -222.10 | 3896 | 3748 | -218.23 |

|             |      |      |      |      |         |      |      |         |
|-------------|------|------|------|------|---------|------|------|---------|
|             | 3883 | 3724 | 3472 | 2519 | -174.98 | 3885 | 3716 | -177.71 |
|             | 3880 | 3671 | 3536 | 2564 | -156.99 | 3884 | 3676 | -161.43 |
|             | 3878 | 3591 | 3710 | 2693 | -153.97 | 3879 | 3592 | -158.78 |
|             |      | 3534 | 3509 | 2546 | -151.92 |      | 3523 | -154.84 |
|             |      | 3484 | 3598 | 2612 | -107.42 |      | 3477 | -110.10 |
|             |      | 3443 | 3704 | 2689 | -104.48 |      | 3433 | -107.09 |
|             |      | 3225 | 3725 | 2704 | -96.22  |      | 3199 | -94.22  |
| <b>W6_3</b> | 3885 | 3805 | 3224 | 2337 | -230.86 | 3884 | 3777 | -226.98 |
|             | 3884 | 3772 | 3456 | 2508 | -168.12 | 3883 | 3757 | -170.78 |
|             | 3880 | 3755 | 3542 | 2571 | -167.52 | 3881 | 3738 | -162.87 |
|             |      | 3678 | 3582 | 2598 | -137.36 |      | 3697 | -142.28 |
|             |      | 3667 | 3690 | 2679 | -119.57 |      | 3684 | -116.16 |
|             |      | 3564 | 3752 | 2724 | -113.04 |      | 3555 | -115.14 |
|             |      | 3534 | 3700 | 2686 | -96.89  |      | 3542 | -97.94  |
|             |      | 3437 | 3789 | 2751 | -92.10  |      | 3422 | -95.98  |
|             |      | 3196 | 3735 | 2711 | -81.67  |      | 3180 | -81.93  |
| <b>W6_4</b> | 3893 | 3500 | 3440 | 2496 | -198.05 | 3896 | 3485 | -206.21 |
|             | 3893 | 3489 | 3441 | 2496 | -198.02 | 3896 | 3475 | -206.21 |
|             | 3888 | 3476 | 3463 | 2513 | -196.36 | 3887 | 3457 | -204.67 |
|             | 3888 | 3436 | 3464 | 2513 | -196.35 | 3887 | 3417 | -204.66 |
|             | 3883 | 3413 | 3473 | 2520 | -189.85 | 3884 | 3394 | -200.23 |
|             | 3883 | 3356 | 3473 | 2520 | -189.80 | 3884 | 3332 | -200.23 |
| <b>W6_5</b> | 3893 | 3501 | 3446 | 2500 | -200.26 | 3895 | 3484 | -206.94 |
|             | 3891 | 3487 | 3450 | 2503 | -197.74 | 3894 | 3472 | -205.07 |
|             | 3886 | 3475 | 3448 | 2501 | -195.36 | 3888 | 3456 | -205.04 |
|             | 3886 | 3432 | 3467 | 2516 | -194.55 | 3886 | 3414 | -204.39 |
|             | 3885 | 3417 | 3460 | 2510 | -194.54 | 3885 | 3396 | -203.02 |
|             | 3885 | 3356 | 3480 | 2525 | -184.65 | 3885 | 3331 | -199.01 |
| <b>W6_6</b> | 3887 | 3712 | 3266 | 2367 | -221.86 | 3899 | 3663 | -228.55 |
|             | 3886 | 3633 | 3463 | 2512 | -191.94 | 3887 | 3639 | -219.15 |
|             | 3883 | 3609 | 3375 | 2447 | -189.90 | 3885 | 3614 | -214.64 |
|             | 3875 | 3578 | 3611 | 2622 | -144.67 | 3878 | 3584 | -143.78 |

|              |      |      |      |      |         |      |      |         |
|--------------|------|------|------|------|---------|------|------|---------|
|              | 3827 | 3470 | 3619 | 2625 | -124.30 | 3876 | 3397 | -143.33 |
|              |      | 3346 | 3643 | 2642 | -116.07 |      | 3279 | -122.39 |
|              |      | 3232 | 3693 | 2682 | -115.54 |      | 3216 | -118.77 |
| <b>W6_7</b>  | 3896 | 3755 | 3356 | 2434 | -215.79 | 3893 | 3729 | -219.35 |
|              | 3889 | 3686 | 3413 | 2475 | -206.96 | 3890 | 3690 | -212.65 |
|              | 3885 | 3628 | 3428 | 2486 | -200.47 | 3885 | 3624 | -207.20 |
|              | 3882 | 3456 | 3416 | 2478 | -200.07 | 3883 | 3436 | -205.02 |
|              | 3880 | 3418 | 3721 | 2703 | -127.15 | 3880 | 3395 | -137.03 |
|              |      | 3374 | 3714 | 2697 | -120.34 |      | 3354 | -119.68 |
|              |      | 3304 | 3652 | 2649 | -107.31 |      | 3281 | -114.06 |
| <b>W6_8</b>  | 3896 | 3753 | 3392 | 2461 | -209.20 | 3895 | 3728 | -214.34 |
|              | 3890 | 3683 | 3415 | 2477 | -205.67 | 3894 | 3690 | -211.78 |
|              | 3886 | 3638 | 3396 | 2463 | -202.32 | 3887 | 3629 | -208.06 |
|              | 3885 | 3463 | 3444 | 2498 | -197.94 | 3886 | 3448 | -205.19 |
|              | 3880 | 3419 | 3721 | 2703 | -134.47 | 3879 | 3398 | -141.82 |
|              |      | 3380 | 3708 | 2693 | -122.97 |      | 3358 | -122.82 |
|              |      | 3322 | 3662 | 2657 | -104.27 |      | 3297 | -111.88 |
| <b>W6_9</b>  | 3888 | 3494 | 3453 | 2505 | -199.18 | 3888 | 3472 | -206.71 |
|              | 3888 | 3476 | 3453 | 2505 | -199.18 | 3887 | 3453 | -206.68 |
|              | 3888 | 3476 | 3453 | 2505 | -199.18 | 3887 | 3453 | -206.62 |
|              | 3887 | 3421 | 3453 | 2505 | -199.17 | 3886 | 3394 | -206.61 |
|              | 3887 | 3421 | 3453 | 2505 | -199.17 | 3886 | 3393 | -206.48 |
|              | 3887 | 3349 | 3453 | 2505 | -199.16 | 3886 | 3316 | -206.46 |
| <b>W6_10</b> | 3893 | 3811 | 3318 | 2406 | -206.64 | 3890 | 3818 | -207.38 |
|              | 3888 | 3789 | 3444 | 2498 | -188.81 | 3889 | 3755 | -194.26 |
|              | 3888 | 3680 | 3487 | 2531 | -187.14 | 3888 | 3690 | -193.26 |
|              | 3887 | 3645 | 3476 | 2522 | -178.61 | 3888 | 3633 | -187.51 |
|              |      | 3504 | 3692 | 2680 | -128.56 |      | 3490 | -126.36 |
|              |      | 3466 | 3773 | 2740 | -105.21 |      | 3449 | -114.79 |
|              |      | 3402 | 3671 | 2663 | -104.23 |      | 3379 | -108.99 |
|              |      | 3287 | 3803 | 2760 | -70.46  |      | 3265 | -64.63  |
| <b>W6_11</b> | 3904 | 3786 | 3376 | 2449 | -212.00 | 3901 | 3766 | -213.37 |

|              |      |      |      |      |         |      |      |         |
|--------------|------|------|------|------|---------|------|------|---------|
|              | 3903 | 3777 | 3387 | 2456 | -201.91 | 3897 | 3748 | -205.56 |
|              | 3885 | 3685 | 3633 | 2638 | -145.17 | 3888 | 3689 | -146.80 |
|              | 3878 | 3671 | 3768 | 2737 | -140.59 | 3880 | 3659 | -136.20 |
|              |      | 3644 | 3653 | 2652 | -129.16 |      | 3647 | -131.64 |
|              |      | 3611 | 3774 | 2741 | -123.04 |      | 3634 | -124.38 |
|              |      | 3405 | 3697 | 2682 | -99.97  |      | 3388 | -109.10 |
|              |      | 3320 | 3695 | 2681 | -98.53  |      | 3302 | -105.32 |
| <b>W6_12</b> | 3892 | 3660 | 3497 | 2539 | -193.24 | 3892 | 3637 | -193.78 |
|              | 3892 | 3627 | 3490 | 2532 | -172.02 | 3890 | 3615 | -177.66 |
|              | 3887 | 3578 | 3486 | 2529 | -171.59 | 3890 | 3562 | -177.56 |
|              | 3884 | 3520 | 3480 | 2524 | -171.07 | 3886 | 3509 | -175.39 |
|              | 3883 | 3487 | 3639 | 2642 | -144.02 | 3884 | 3477 | -146.39 |
|              |      | 3479 | 3620 | 2627 | -127.01 |      | 3468 | -133.14 |
|              |      | 3394 | 3624 | 2629 | -126.19 |      | 3383 | -130.99 |
| <b>W6_13</b> | 3898 | 3710 | 3146 | 2278 | -224.45 | 3896 | 3697 | -234.79 |
|              | 3892 | 3606 | 3638 | 2639 | -151.34 | 3894 | 3612 | -154.03 |
|              | 3886 | 3598 | 3564 | 2586 | -145.29 | 3886 | 3588 | -150.60 |
|              | 3883 | 3582 | 3571 | 2591 | -143.81 | 3885 | 3571 | -149.81 |
|              | 3846 | 3543 | 3667 | 2659 | -141.45 | 3852 | 3542 | -148.37 |
|              |      | 3525 | 3590 | 2603 | -138.80 |      | 3516 | -141.69 |
|              |      | 3114 | 3600 | 2610 | -133.63 |      | 3048 | -138.87 |
| <b>W6_14</b> | 3905 | 3821 | 3502 | 2542 | -189.31 | 3899 | 3823 | -186.53 |
|              | 3902 | 3729 | 3517 | 2552 | -162.83 | 3896 | 3712 | -166.20 |
|              | 3885 | 3689 | 3468 | 2517 | -158.48 | 3888 | 3689 | -158.22 |
|              | 3884 | 3673 | 3561 | 2583 | -152.54 | 3887 | 3665 | -155.21 |
|              |      | 3562 | 3716 | 2698 | -126.55 |      | 3555 | -129.67 |
|              |      | 3519 | 3817 | 2772 | -113.13 |      | 3527 | -112.78 |
|              |      | 3492 | 3697 | 2683 | -99.05  |      | 3492 | -101.72 |
|              |      | 3411 | 3713 | 2693 | -96.48  |      | 3415 | -95.66  |
| <b>W6_15</b> | 3928 | 3702 | 3362 | 2438 | -190.26 | 3921 | 3700 | -188.90 |
|              | 3890 | 3698 | 3473 | 2522 | -183.82 | 3890 | 3678 | -184.21 |
|              | 3884 | 3628 | 3693 | 2682 | -147.49 | 3887 | 3636 | -147.51 |

|              |      |      |      |      |         |      |      |         |
|--------------|------|------|------|------|---------|------|------|---------|
|              | 3881 | 3594 | 3644 | 2646 | -129.81 | 3883 | 3594 | -130.31 |
|              | 3799 | 3554 | 3592 | 2606 | -127.25 | 3819 | 3551 | -129.18 |
|              |      | 3463 | 3595 | 2608 | -125.03 |      | 3453 | -128.07 |
|              |      | 3328 | 3670 | 2665 | -124.70 |      | 3318 | -126.52 |
| <b>W6_16</b> | 3893 | 3822 | 3449 | 2503 | -186.16 | 3889 | 3813 | -189.42 |
|              | 3883 | 3807 | 3516 | 2550 | -158.49 | 3886 | 3798 | -159.96 |
|              | 3882 | 3696 | 3532 | 2566 | -131.26 | 3882 | 3729 | -126.68 |
|              |      | 3678 | 3531 | 2566 | -125.08 |      | 3686 | -122.34 |
|              |      | 3664 | 3698 | 2684 | -98.57  |      | 3670 | -99.54  |
|              |      | 3551 | 3690 | 2678 | -98.06  |      | 3549 | -98.87  |
|              |      | 3536 | 3721 | 2700 | -91.49  |      | 3542 | -83.01  |
|              |      | 3479 | 3788 | 2749 | -66.41  |      | 3477 | -65.41  |
|              |      | 3409 | 3793 | 2752 | -60.82  |      | 3395 | -61.99  |
| <b>W6_17</b> | 3905 | 3780 | 3429 | 2487 | -164.67 | 3897 | 3758 | -164.49 |
|              | 3893 | 3744 | 3635 | 2639 | -139.91 | 3893 | 3720 | -142.69 |
|              | 3890 | 3700 | 3628 | 2632 | -124.85 | 3889 | 3691 | -131.44 |
|              | 3881 | 3679 | 3628 | 2632 | -123.01 | 3881 | 3685 | -128.51 |
|              |      | 3630 | 3717 | 2698 | -112.57 |      | 3620 | -112.03 |
|              |      | 3624 | 3713 | 2695 | -98.47  |      | 3616 | -103.26 |
|              |      | 3564 | 3743 | 2717 | -97.73  |      | 3554 | -99.18  |
|              |      | 3405 | 3730 | 2705 | -86.39  |      | 3386 | -89.73  |
| <b>W6_18</b> | 3926 | 3757 | 3617 | 2626 | -147.00 | 3918 | 3738 | -150.00 |
|              | 3896 | 3692 | 3535 | 2565 | -141.20 | 3896 | 3666 | -146.66 |
|              | 3894 | 3657 | 3654 | 2653 | -133.78 | 3894 | 3661 | -137.94 |
|              | 3887 | 3628 | 3591 | 2605 | -131.29 | 3890 | 3618 | -135.56 |
|              | 3797 | 3600 | 3643 | 2643 | -120.42 | 3816 | 3594 | -126.33 |
|              |      | 3546 | 3715 | 2697 | -111.60 |      | 3534 | -118.35 |
|              |      | 3502 | 3696 | 2683 | -103.81 |      | 3495 | -105.69 |
| <b>W6_19</b> | 3886 | 3848 | 3307 | 2397 | -227.27 |      |      |         |
|              | 3885 | 3701 | 3248 | 2353 | -223.41 |      |      |         |
|              | 3883 | 3653 | 3564 | 2585 | -151.74 |      |      |         |
|              | 3881 | 3600 | 3614 | 2624 | -148.71 |      |      |         |

|              |      |      |      |      |         |
|--------------|------|------|------|------|---------|
|              |      | 3580 | 3621 | 2629 | -141.20 |
|              |      | 3538 | 3609 | 2619 | -128.89 |
|              |      | 3316 | 3714 | 2695 | -91.75  |
|              |      | 3194 | 3831 | 2781 | -53.12  |
| <b>W6_20</b> | 3900 | 3769 | 3387 | 2458 | -209.85 |
|              | 3889 | 3681 | 3399 | 2466 | -203.06 |
|              | 3884 | 3644 | 3432 | 2490 | -202.98 |
|              | 3881 | 3456 | 3419 | 2480 | -200.43 |
|              | 3880 | 3422 | 3750 | 2724 | -130.11 |
|              |      | 3378 | 3693 | 2681 | -128.69 |
|              |      | 3320 | 3671 | 2663 | -102.18 |
| <b>W6_21</b> | 3899 | 3842 | 3333 | 2417 | -205.66 |
|              | 3883 | 3808 | 3544 | 2573 | -168.44 |
|              | 3878 | 3729 | 3671 | 2665 | -132.01 |
|              |      | 3729 | 3802 | 2761 | -118.19 |
|              |      | 3680 | 3701 | 2687 | -117.24 |
|              |      | 3644 | 3599 | 2611 | -114.83 |
|              |      | 3586 | 3699 | 2684 | -110.94 |
|              |      | 3526 | 3764 | 2732 | -66.05  |
|              |      | 3305 | 3810 | 2766 | -48.28  |
| <b>W6_22</b> | 3890 | 3800 | 3493 | 2535 | -171.36 |
|              | 3887 | 3757 | 3599 | 2613 | -157.38 |
|              | 3879 | 3648 | 3622 | 2631 | -144.23 |
|              | 3878 | 3624 | 3552 | 2577 | -142.47 |
|              |      | 3592 | 3612 | 2621 | -126.16 |
|              |      | 3584 | 3663 | 2658 | -125.66 |
|              |      | 3514 | 3787 | 2748 | -84.28  |
|              |      | 3468 | 3742 | 2717 | -55.55  |
| <b>W6_23</b> | 3924 | 3780 | 3232 | 2341 | -214.14 |
|              | 3904 | 3738 | 3438 | 2494 | -187.14 |
|              | 3883 | 3692 | 3607 | 2618 | -139.22 |
|              | 3877 | 3604 | 3595 | 2608 | -134.65 |

|              |      |      |      |      |         |      |      |         |
|--------------|------|------|------|------|---------|------|------|---------|
|              | 3796 | 3566 | 3721 | 2702 | -112.53 |      |      |         |
|              |      | 3429 | 3773 | 2737 | -93.46  |      |      |         |
|              |      | 3197 | 3717 | 2696 | -84.49  |      |      |         |
| <b>W6_24</b> |      |      |      |      |         | 3898 | 3738 | -213.18 |
|              |      |      |      |      |         | 3896 | 3687 | -213.03 |
|              |      |      |      |      |         | 3886 | 3639 | -208.26 |
|              |      |      |      |      |         | 3884 | 3438 | -207.66 |
|              |      |      |      |      |         | 3880 | 3406 | -138.20 |
|              |      |      |      |      |         |      | 3372 | -127.01 |
|              |      |      |      |      |         |      | 3303 | -109.09 |
| <b>W6_25</b> |      |      |      |      |         | 3893 | 3753 | -207.36 |
|              |      |      |      |      |         | 3891 | 3659 | -205.45 |
|              |      |      |      |      |         | 3888 | 3606 | -203.25 |
|              |      |      |      |      |         | 3882 | 3457 | -201.87 |
|              |      |      |      |      |         | 3881 | 3415 | -147.16 |
|              |      |      |      |      |         |      | 3362 | -118.41 |
|              |      |      |      |      |         |      | 3310 | -111.81 |
| <b>W6_26</b> |      |      |      |      |         | 3916 | 3723 | -218.43 |
|              |      |      |      |      |         | 3888 | 3537 | -207.31 |
|              |      |      |      |      |         | 3887 | 3458 | -200.45 |
|              |      |      |      |      |         | 3883 | 3416 | -187.56 |
|              |      |      |      |      |         | 3883 | 3372 | -171.26 |
|              |      |      |      |      |         | 3815 | 3285 | -121.20 |
| <b>W6_27</b> |      |      |      |      |         | 3896 | 3799 | -219.90 |
|              |      |      |      |      |         | 3894 | 3693 | -155.81 |
|              |      |      |      |      |         | 3884 | 3689 | -146.48 |
|              |      |      |      |      |         | 3879 | 3664 | -131.84 |
|              |      |      |      |      |         |      | 3628 | -130.15 |
|              |      |      |      |      |         |      | 3594 | -117.79 |
|              |      |      |      |      |         |      | 3548 | -109.99 |
|              |      |      |      |      |         |      | 3232 | -94.09  |
| <b>W6_28</b> |      |      |      |      |         | 3895 | 3819 | -210.37 |

|              |      |      |         |
|--------------|------|------|---------|
|              | 3885 | 3746 | -187.61 |
|              | 3882 | 3715 | -139.48 |
|              | 3872 | 3663 | -120.97 |
|              |      | 3634 | -117.60 |
|              |      | 3601 | -115.82 |
|              |      | 3451 | -53.57  |
|              |      | 3251 | -45.72  |
| <b>W6_29</b> | 3920 | 3714 | -220.87 |
|              | 3892 | 3666 | -210.73 |
|              | 3888 | 3593 | -154.23 |
|              | 3881 | 3541 | -144.07 |
|              | 3864 | 3346 | -132.08 |
|              | 3818 | 3240 | -86.89  |
| <b>W6_30</b> | 3888 | 3758 | -164.91 |
|              | 3883 | 3753 | -132.69 |
|              | 3882 | 3684 | -131.77 |
|              | 3881 | 3671 | -117.68 |
|              |      | 3621 | -112.14 |
|              |      | 3594 | -100.90 |
|              |      | 3517 | -85.64  |
|              |      | 3497 | -82.73  |

**Table S2. Average values of the free and hydrogen bonded O–H stretching frequencies ( $\text{cm}^{-1}$ ), their shifts and the average electric field ( $\text{MV cm}^{-1}$ ) produced at hydrogen bonded O–H groups for the water clusters calculated at various levels of theory. Vibrational frequency shifts listed in Columns (a) and (b) are the average of selectively labelled hydrogen bonded O–H group in the deuterated water cluster and O–D group in the water cluster**



| Structure    | MP2/aug-cc-pVDZ                |                                  |                            |                                         |                                         |             | B3LYP/6-311++G(d,p)            |                                  |                            |             |  |
|--------------|--------------------------------|----------------------------------|----------------------------|-----------------------------------------|-----------------------------------------|-------------|--------------------------------|----------------------------------|----------------------------|-------------|--|
|              | $\nu_{\text{O-H}} \text{free}$ | $\nu_{\text{O-H}} \text{H-bond}$ | $ \Delta\nu_{\text{O-H}} $ | $ \Delta\nu_{\text{O-H}} \text{H-bond}$ | $ \Delta\nu_{\text{O-D}} \text{H-bond}$ | Elec. Field | $\nu_{\text{O-H}} \text{free}$ | $\nu_{\text{O-H}} \text{H-bond}$ | $ \Delta\nu_{\text{O-H}} $ | Elec. Field |  |
|              |                                |                                  | (a)                        | (b)                                     |                                         |             |                                |                                  |                            |             |  |
| <b>W2</b>    | 3876                           | 3704                             | 172                        | 144                                     | 103                                     | -73.79      | 3874                           | 3706                             | 168                        | -81.79      |  |
| <b>W3_1</b>  | 3893                           | 3616                             | 277                        | 239                                     | 172                                     | -123.31     | 3892                           | 3604                             | 288                        | -130.91     |  |
| <b>W3_2</b>  | 3899                           | 3631                             | 268                        | 223                                     | 161                                     | -121.39     | 3899                           | 3623                             | 276                        | -129.00     |  |
| <b>W4_1</b>  | 3885                           | 3473                             | 412                        | 387                                     | 280                                     | -173.00     | 3885                           | 3456                             | 429                        | -179.78     |  |
| <b>W4_2</b>  | 3887                           | 3483                             | 404                        | 376                                     | 273                                     | -170.68     | 3888                           | 3471                             | 417                        | -177.62     |  |
| <b>W4_3</b>  | 3893                           | 3652                             | 241                        | 208                                     | 150                                     | -107.77     | 3891                           | 3641                             | 250                        | -111.13     |  |
| <b>W4_4</b>  | 3876                           | 3635                             | 241                        | 229                                     | 164                                     | -119.58     | 3878                           | 3624                             | 254                        | -125.87     |  |
| <b>W4_5</b>  | 3878                           | 3634                             | 244                        | 229                                     | 165                                     | -120.68     | 3880                           | 3624                             | 256                        | -126.57     |  |
| <b>W4_6</b>  | 3859                           | 3796                             | 63                         | 76                                      | 53                                      | -44.88      | 3857                           | 3789                             | 68                         | -48.60      |  |
| <b>W4_7</b>  | --                             | --                               | --                         | --                                      | --                                      | --          | 3886                           | 3616                             | 270                        | -123.46     |  |
| <b>W5_1</b>  | 3886                           | 3442                             | 444                        | 419                                     | 304                                     | -191.19     | 3886                           | 3421                             | 465                        | -198.44     |  |
| <b>W5_2</b>  | 3887                           | 3457                             | 430                        | 403                                     | 292                                     | -184.78     | 3890                           | 3442                             | 448                        | -194.57     |  |
| <b>W5_3</b>  | 3888                           | 3558                             | 330                        | 305                                     | 220                                     | -151.95     | 3888                           | 3544                             | 344                        | -156.99     |  |
| <b>W5_4</b>  | 3889                           | 3552                             | 337                        | 309                                     | 224                                     | -146.03     | 3890                           | 3544                             | 346                        | -148.79     |  |
| <b>W5_5</b>  | 3876                           | 3516                             | 360                        | 348                                     | 252                                     | -161.78     | 3879                           | 3503                             | 376                        | -167.53     |  |
| <b>W5_6</b>  | 3893                           | 3613                             | 280                        | 247                                     | 178                                     | -130.72     | 3892                           | 3600                             | 292                        | -135.78     |  |
| <b>W5_7</b>  | 3863                           | 3698                             | 165                        | 173                                     | 123                                     | -88.55      | 3861                           | 3691                             | 170                        | -90.56      |  |
| <b>W5_8</b>  | 3882                           | 3666                             | 216                        | 199                                     | 142                                     | -110.25     | 3879                           | 3655                             | 224                        | -113.45     |  |
| <b>W5_9</b>  | --                             | --                               | --                         | --                                      | --                                      | --          | 3890                           | 3443                             | 446                        | -194.63     |  |
| <b>W5_10</b> | --                             | --                               | --                         | --                                      | --                                      | --          | 3877                           | 3652                             | 225                        | -109.79     |  |
| <b>W5_11</b> | --                             | --                               | --                         | --                                      | --                                      | --          | 3873                           | 3654                             | 219                        | -116.93     |  |
| <b>W5_12</b> | --                             | --                               | --                         | --                                      | --                                      | --          | 3871                           | 3652                             | 219                        | -116.10     |  |
| <b>W5_13</b> | --                             | --                               | --                         | --                                      | --                                      | --          | 3875                           | 3657                             | 218                        | -107.40     |  |
| <b>W6_1</b>  | 3884                           | 3496                             | 388                        | 367                                     | 266                                     | -169.33     | 3885                           | 3484                             | 401                        | -173.65     |  |

|              |      |      |     |     |     |         |      |      |     |         |
|--------------|------|------|-----|-----|-----|---------|------|------|-----|---------|
| <b>W6_2</b>  | 3884 | 3554 | 330 | 311 | 225 | -146.01 | 3886 | 3545 | 341 | -147.80 |
| <b>W6_3</b>  | 3883 | 3601 | 282 | 267 | 192 | -134.13 | 3883 | 3595 | 288 | -134.45 |
| <b>W6_4</b>  | 3888 | 3445 | 443 | 416 | 301 | -194.74 | 3889 | 3427 | 462 | -203.70 |
| <b>W6_5</b>  | 3888 | 3445 | 443 | 416 | 301 | -194.51 | 3889 | 3425 | 464 | -203.91 |
| <b>W6_6</b>  | 3872 | 3512 | 360 | 351 | 254 | -157.76 | 3885 | 3485 | 400 | -170.09 |
| <b>W6_7</b>  | 3886 | 3517 | 369 | 346 | 250 | -168.30 | 3886 | 3501 | 385 | -173.57 |
| <b>W6_8</b>  | 3887 | 3523 | 364 | 341 | 246 | -168.12 | 3888 | 3507 | 381 | -173.70 |
| <b>W6_9</b>  | 3888 | 3439 | 449 | 422 | 306 | -199.17 | 3887 | 3414 | 473 | -206.59 |
| <b>W6_10</b> | 3889 | 3573 | 316 | 292 | 211 | -146.21 | 3889 | 3560 | 329 | -149.65 |
| <b>W6_11</b> | 3893 | 3612 | 281 | 252 | 181 | -143.80 | 3891 | 3604 | 287 | -146.55 |
| <b>W6_12</b> | 3887 | 3535 | 352 | 327 | 236 | -157.88 | 3889 | 3521 | 368 | -162.13 |
| <b>W6_13</b> | 3881 | 3525 | 356 | 335 | 244 | -154.11 | 3883 | 3511 | 372 | -159.74 |
| <b>W6_14</b> | 3894 | 3612 | 282 | 251 | 181 | -137.30 | 3892 | 3610 | 282 | -138.25 |
| <b>W6_15</b> | 3876 | 3567 | 309 | 299 | 215 | -146.91 | 3880 | 3561 | 319 | -147.82 |
| <b>W6_16</b> | 3886 | 3627 | 259 | 239 | 172 | -112.93 | 3885 | 3629 | 256 | -111.91 |
| <b>W6_17</b> | 3892 | 3641 | 251 | 222 | 160 | -118.45 | 3890 | 3629 | 261 | -121.42 |
| <b>W6_18</b> | 3880 | 3626 | 254 | 239 | 172 | -127.01 | 3883 | 3615 | 268 | -131.50 |
| <b>W6_19</b> | 3884 | 3554 | 330 | 311 | 225 | -145.76 | --   | --   | --  | --      |
| <b>W6_20</b> | 3887 | 3524 | 363 | 339 | 245 | -168.19 | --   | --   | --  | --      |
| <b>W6_21</b> | 3887 | 3650 | 237 | 217 | 156 | -120.18 | --   | --   | --  | --      |
| <b>W6_22</b> | 3883 | 3623 | 260 | 241 | 173 | -125.89 | --   | --   | --  | --      |
| <b>W6_23</b> | 3877 | 3572 | 305 | 291 | 211 | -137.95 | --   | --   | --  | --      |
| <b>W6_24</b> | --   | --   | --  | --  | --  | --      | 3889 | 3512 | 377 | -173.78 |
| <b>W6_25</b> | --   | --   | --  | --  | --  | --      | 3887 | 3509 | 378 | -170.76 |
| <b>W6_26</b> | --   | --   | --  | --  | --  | --      | 3879 | 3465 | 414 | -184.37 |
| <b>W6_27</b> | --   | --   | --  | --  | --  | --      | 3889 | 3606 | 283 | -138.26 |
| <b>W6_28</b> | --   | --   | --  | --  | --  | --      | 3884 | 3610 | 274 | -123.89 |
| <b>W6_29</b> | --   | --   | --  | --  | --  | --      | 3877 | 3517 | 360 | -158.14 |

|              |    |    |    |    |    |    |      |      |     |         |
|--------------|----|----|----|----|----|----|------|------|-----|---------|
| <b>W6_30</b> | -- | -- | -- | -- | -- | -- | 3883 | 3637 | 246 | -116.06 |
|--------------|----|----|----|----|----|----|------|------|-----|---------|

---

**Cartesian coordinates of various hydrogen bonded water clusters considered in the present investigation at MP2/aug-cc-pVDZ level of theory. Coordinates at B3LYP/6-311++G(d,p) level are given for which MP2 level structures are not found.**

\*\*\*\*\*

**W2 (MP2)**

|   |             |             |             |
|---|-------------|-------------|-------------|
| O | 1.51646400  | -0.00360900 | -0.12278400 |
| H | 1.91858900  | 0.02249200  | 0.75387900  |
| H | 0.55948300  | 0.00381700  | 0.05212700  |
| O | -1.38925800 | 0.00326900  | 0.11222200  |
| H | -1.75205700 | 0.75060000  | -0.38183500 |
| H | -1.74366100 | -0.77418700 | -0.33967300 |

\*\*\*\*\*

**W3\_1 (MP2)**

|   |             |             |             |
|---|-------------|-------------|-------------|
| O | 1.28725000  | -0.97617200 | -0.09356500 |
| H | 1.95714400  | -1.24334100 | 0.54730400  |
| H | 1.22682000  | -0.00292300 | -0.01153400 |
| O | 0.20524800  | 1.60086300  | 0.11059600  |
| H | 0.13294400  | 2.24412100  | -0.60533400 |
| H | -0.61025300 | 1.06362900  | 0.05106700  |
| O | -1.49421100 | -0.61724300 | -0.08366700 |
| H | -2.05963900 | -1.04472100 | 0.57085600  |
| H | -0.63331200 | -1.07634600 | -0.01927400 |

**W3\_2 (MP2)**

|   |             |             |             |
|---|-------------|-------------|-------------|
| O | -0.76899200 | -1.42238300 | -0.06857800 |
| H | -0.93398900 | -2.15183300 | 0.54054500  |
| H | 0.18752500  | -1.23526200 | 0.00582000  |
| O | 1.61587300  | 0.04507200  | -0.06722200 |
| H | 0.97679300  | 0.78075500  | 0.00848300  |
| H | 2.33765800  | 0.27151100  | 0.53113500  |
| O | -0.84643300 | 1.37642500  | -0.06667000 |
| H | -1.40921600 | 1.88760900  | 0.52678100  |
| H | -1.16235800 | 0.45430400  | 0.00699800  |

\*\*\*\*\*

**W4\_1 (MP2)**

|   |             |             |             |
|---|-------------|-------------|-------------|
| O | -0.12975700 | 1.93850600  | -0.00526600 |
| H | -0.30301000 | 2.50928800  | -0.76388200 |
| H | -0.87500000 | 1.29429400  | 0.00394100  |
| O | 0.12974200  | -1.93852400 | -0.00530400 |
| H | 0.30296600  | -2.50907200 | -0.76410700 |
| H | 0.87499400  | -1.29432300 | 0.00416600  |
| O | -1.93858600 | -0.12976800 | 0.00551400  |
| H | -2.50891500 | -0.30281900 | 0.76452100  |
| H | -1.29439400 | -0.87502600 | -0.00390500 |
| O | 1.93856800  | 0.12974900  | 0.00502700  |
| H | 2.50925400  | 0.30294400  | 0.76372900  |

H 1.29437600 0.87501000 -0.00422800

#### W4\_2 (MP2)

O 0.89958400 1.72218500 0.09384000  
H 1.08469000 2.34397200 -0.62044500  
H -0.07312000 1.57573300 0.05939200  
O -0.89959700 -1.72222200 -0.09380800  
H -1.08472800 -2.34368100 0.62076000  
H 0.07312700 -1.57589600 -0.05949500  
O -1.73155100 0.89162600 0.09688600  
H -2.39748100 1.07955900 -0.57551800  
H -1.56045900 -0.07555300 0.02241800  
O 1.73157000 -0.89161300 -0.09693100  
H 2.39744100 -1.07950700 0.57554400  
H 1.56048400 0.07557500 -0.02255800

#### W4\_3 (MP2)

O -1.96420800 -0.12442800 -0.78250700  
H -1.42619400 0.66037900 -0.57617200  
H -1.89752300 -0.22078800 -1.74100000  
O 1.85648500 -0.24166000 -0.84117000  
H 2.78808100 -0.08400900 -1.03630400  
H 1.52334600 0.60088800 -0.48366200  
O -0.06663800 -1.21492500 1.11279100  
H -0.81606600 -1.23882300 0.48926000  
H 0.70474200 -1.33037300 0.53076400  
O 0.06115500 1.44462400 0.57490800  
H 0.01995400 2.12543900 1.25726500  
H 0.00930300 0.57839900 1.04766900

#### W4\_4 (MP2)

O 1.70890300 1.41447100 -0.29574800  
H 0.85791500 1.16450900 0.12855200  
H 2.14093700 1.99785700 0.34031600  
O -3.07108500 -0.13054400 -0.34138500  
H -3.76180700 -0.06508300 0.33140100  
H -3.28435600 0.56881100 -0.97330900  
O 1.90102400 -1.38820200 -0.09917100  
H 2.10477000 -0.45233200 -0.30022100  
H 2.14705300 -1.87458400 -0.89518200  
O -0.41593200 0.03974600 0.79259500  
H -1.28875800 -0.07658200 0.37872600  
H 0.10096800 -0.74636300 0.53938600

#### W4\_5 (MP2)

O 0.38635500 0.02668500 0.95844200  
H -0.13563600 -0.75509000 0.70307400  
H 1.25153900 -0.09337000 0.52866300  
O 2.95122800 -0.15193300 -0.36299900  
H 2.92617100 0.25937900 -1.23733000

|   |             |             |             |
|---|-------------|-------------|-------------|
| H | 3.69647000  | 0.27307200  | 0.08159800  |
| O | -1.60198000 | 1.42910900  | -0.32674500 |
| H | -0.80860400 | 1.15552400  | 0.18713700  |
| H | -2.03865000 | 2.09210600  | 0.22166300  |
| O | -1.77095300 | -1.38402900 | -0.27932000 |
| H | -2.57646300 | -1.84237900 | -0.01215700 |
| H | -2.03203300 | -0.44789200 | -0.38767600 |

#### W4\_6 (MP2)

|   |             |             |             |
|---|-------------|-------------|-------------|
| O | -0.00060600 | 1.98295000  | 0.00122600  |
| H | 0.76132600  | 1.38379700  | -0.00749600 |
| H | -0.76302300 | 1.38435500  | -0.00206100 |
| O | 0.00071400  | -1.98294500 | 0.00135800  |
| H | -0.76177200 | -1.38444700 | -0.00166300 |
| H | 0.76257600  | -1.38362800 | -0.00158000 |
| O | -2.26874600 | -0.00023700 | -0.00124700 |
| H | -2.85519600 | -0.00140900 | 0.76686300  |
| H | -2.86367800 | -0.00148900 | -0.76278500 |
| O | 2.26875600  | 0.00034100  | -0.00188400 |
| H | 2.84851700  | 0.00800800  | 0.77126500  |
| H | 2.87030700  | -0.00606400 | -0.75815900 |

#### W4\_7 (B3LYP)

|   |             |             |             |
|---|-------------|-------------|-------------|
| O | -1.61530000 | -1.39593900 | -0.24894600 |
| H | -1.93962000 | -0.50467500 | -0.47625600 |
| H | -1.57316800 | -1.89380500 | -1.07079000 |
| O | 2.96209500  | -0.00651700 | -0.45723200 |
| H | 2.97599300  | 0.77714800  | -1.01351700 |
| H | 2.09866600  | 0.01184800  | -0.01307500 |
| O | 0.43791100  | -0.06038900 | 0.97021000  |
| H | -0.15479100 | -0.76322000 | 0.62483000  |
| H | 0.62945600  | -0.28819300 | 1.88558900  |
| O | -1.65492000 | 1.37691100  | -0.30086400 |
| H | -2.19383600 | 2.07650100  | 0.07902900  |
| H | -0.88098900 | 1.27186700  | 0.27885000  |

\*\*\*\*\*

#### W5\_1 (MP2)

|   |             |             |             |
|---|-------------|-------------|-------------|
| O | -1.83305500 | -1.43438000 | 0.08445900  |
| H | -2.28345400 | -1.70997100 | 0.89191700  |
| H | -1.92917300 | -0.45358700 | 0.06040100  |
| O | 0.78470000  | -2.16304400 | -0.17353800 |
| H | -0.17086700 | -1.93387100 | -0.08561600 |
| H | 0.84865200  | -2.63713300 | -1.01154900 |
| O | -1.91422700 | 1.29789100  | -0.09281800 |
| H | -2.42049700 | 1.87501500  | 0.49119700  |
| H | -0.99823700 | 1.66475000  | -0.07926800 |
| O | 0.65582800  | 2.21908700  | -0.05288800 |
| H | 1.28623500  | 1.46756000  | 0.05316000  |
| H | 0.96312800  | 2.68310800  | -0.84138400 |

|   |            |             |            |
|---|------------|-------------|------------|
| O | 2.31622300 | 0.06609700  | 0.17166500 |
| H | 2.82941700 | -0.07569200 | 0.97624800 |
| H | 1.79904500 | -0.76538000 | 0.04985700 |

#### W5\_2 (MP2)

|   |             |             |             |
|---|-------------|-------------|-------------|
| O | 0.73772100  | 2.13040800  | -0.21254000 |
| H | -0.17195600 | 1.89327700  | 0.08134900  |
| H | 0.62114600  | 2.46651600  | -1.10997000 |
| O | -1.72330400 | 1.25686600  | 0.63817400  |
| H | -1.89247500 | 0.40617900  | 0.17166700  |
| H | -2.54741200 | 1.75392300  | 0.57696300  |
| O | -1.76255500 | -1.12836000 | -0.68318200 |
| H | -0.95818800 | -1.57647100 | -0.32719200 |
| H | -2.42212000 | -1.82557300 | -0.77570800 |
| O | 2.29616200  | -0.11831500 | -0.14175200 |
| H | 1.78045300  | 0.72233100  | -0.15301000 |
| H | 3.09494400  | 0.08139900  | 0.36057500  |
| O | 0.54529300  | -2.16338100 | 0.35583800  |
| H | 1.23460200  | -1.47403100 | 0.20768400  |
| H | 0.51446000  | -2.26529300 | 1.31534000  |

#### W5\_3 (MP2)

|   |             |             |             |
|---|-------------|-------------|-------------|
| O | 1.76275200  | 1.45086600  | 0.28792900  |
| H | 1.94528600  | 1.78728600  | 1.17383600  |
| H | 1.95793200  | 0.48417700  | 0.33920500  |
| O | 1.95051600  | -1.26460500 | 0.35782800  |
| H | 1.07819400  | -1.48485900 | -0.05187600 |
| H | 2.59753400  | -1.79651800 | -0.12100300 |
| O | -2.50009300 | -0.19865900 | 0.82021500  |
| H | -2.64403400 | 0.04473700  | 1.74251400  |
| H | -2.00968500 | 0.55014100  | 0.43072100  |
| O | -0.75018300 | 1.38730600  | -0.74531200 |
| H | 0.15091000  | 1.53522000  | -0.36742400 |
| H | -0.90074800 | 2.12026800  | -1.35414500 |
| O | -0.51011300 | -1.51541900 | -0.78681700 |
| H | -0.58130500 | -0.61321300 | -1.14563000 |
| H | -1.21710800 | -1.50315700 | -0.11693800 |

#### W5\_4 (MP2)

|   |             |             |             |
|---|-------------|-------------|-------------|
| H | 0.51356100  | -0.83802700 | 1.21331300  |
| O | -0.02787000 | -0.16705000 | 1.70053100  |
| H | 0.10523300  | -0.34666900 | 2.63906800  |
| H | 1.30980800  | -2.55902900 | -0.31241900 |
| O | 1.36247800  | -1.62706300 | -0.06934000 |
| H | 0.93665100  | -1.13196400 | -0.81834000 |
| H | 0.59446500  | 1.42685000  | 0.78952100  |
| O | 0.79899700  | 2.04984600  | 0.06637100  |
| H | 1.70497000  | 2.33573700  | 0.23760400  |
| H | -2.96337100 | -0.70319100 | 0.05985500  |
| O | -2.22384200 | -0.10608200 | -0.10424400 |

|   |             |             |             |
|---|-------------|-------------|-------------|
| H | -1.65348600 | -0.17841600 | 0.68456600  |
| H | -0.83853100 | -0.06354500 | -1.46959600 |
| O | 0.07867600  | 0.00248300  | -1.79651300 |
| H | 0.38318900  | 0.84118100  | -1.39801300 |

#### W5\_5 (MP2)

|   |             |             |             |
|---|-------------|-------------|-------------|
| H | 0.07448200  | -1.27456400 | -0.48506200 |
| O | 0.75178500  | -1.93941900 | -0.19902700 |
| H | 0.91095300  | -2.48279300 | -0.98056600 |
| H | -3.40078200 | -0.54207500 | 1.30672200  |
| O | -3.40078400 | 0.11529500  | 0.59820100  |
| H | -4.17797800 | -0.10415900 | 0.06751600  |
| H | 2.05625800  | -0.86869100 | 0.33703400  |
| O | 2.65659900  | -0.12656500 | 0.58475300  |
| H | 2.88515000  | -0.28982800 | 1.50794100  |
| H | 1.43829700  | 2.52536400  | -0.75796900 |
| O | 0.98885000  | 1.96326700  | -0.11521000 |
| H | 1.66927500  | 1.31173300  | 0.16883700  |
| H | -0.36012000 | 0.84926700  | -0.65657500 |
| O | -0.91632600 | 0.07471500  | -0.88563400 |
| H | -1.73653000 | 0.17739900  | -0.37253500 |

#### W5\_6 (MP2)

|   |             |             |             |
|---|-------------|-------------|-------------|
| H | -2.83541900 | -0.98595200 | -1.77415400 |
| O | -2.36586300 | -1.08533700 | -0.93705400 |
| H | -2.73727800 | -0.39518900 | -0.35154000 |
| H | -2.69683100 | 1.03778200  | 1.82643000  |
| O | -2.48720000 | 1.03373000  | 0.88463300  |
| H | -1.52033000 | 0.88856300  | 0.83614100  |
| H | 2.69687000  | -1.03749500 | 1.82653800  |
| O | 2.48723300  | -1.03361900 | 0.88474200  |
| H | 1.52035900  | -0.88848400 | 0.83623300  |
| H | 2.73727400  | 0.39515600  | -0.35161700 |
| O | 2.36582600  | 1.08523200  | -0.93719400 |
| H | 2.83537900  | 0.98578900  | -1.77428900 |
| H | -0.61031500 | -0.49005800 | -0.49270900 |
| O | 0.00000000  | -0.00001500 | 0.09384000  |
| H | 0.61031300  | 0.48996200  | -0.49276800 |

#### W5\_7 (MP2)

|   |             |             |             |
|---|-------------|-------------|-------------|
| H | 3.04439300  | -0.00001600 | 0.76599100  |
| O | 2.59546500  | 0.00000800  | -0.09069400 |
| H | 3.31310900  | 0.00000900  | -0.73831500 |
| H | 1.05760400  | -1.35906000 | -0.15825100 |
| O | 0.21927600  | -1.83282200 | -0.03721100 |
| H | -0.35843900 | -1.45933900 | -0.72479500 |
| H | -2.60483500 | 0.00009000  | -1.66790900 |
| O | -1.75181800 | 0.00002500  | -1.21714100 |
| H | -1.95443400 | -0.00000400 | -0.25192400 |
| H | -0.87232900 | -0.75904400 | 1.34165900  |



|   |             |             |             |
|---|-------------|-------------|-------------|
| O | -1.46365200 | -0.00006200 | 1.50402600  |
| H | -0.87237800 | 0.75898000  | 1.34176900  |
| H | 1.05759700  | 1.35912000  | -0.15819200 |
| O | 0.21925000  | 1.83284500  | -0.03714600 |
| H | -0.35846600 | 1.45931600  | -0.72470400 |

#### W5\_8 (MP2)

|   |             |             |             |
|---|-------------|-------------|-------------|
| O | 1.49709000  | 0.01870300  | 1.49487600  |
| H | 1.80635800  | 0.78257900  | 0.97566200  |
| H | 1.83972000  | -0.74534400 | 0.99859500  |
| O | 1.45490200  | -1.94081500 | -0.65029100 |
| H | 1.30023000  | -2.86663200 | -0.87143600 |
| H | 0.59315600  | -1.49900500 | -0.77047400 |
| O | -0.60355100 | -0.03036400 | -0.28622800 |
| H | -1.55053700 | -0.01406000 | -0.06260400 |
| H | -0.11113500 | -0.01182300 | 0.56434500  |
| O | -3.45121400 | 0.05056200  | 0.17059300  |
| H | -3.98132700 | 0.02031300  | -0.63677300 |
| H | -3.88297100 | -0.57633600 | 0.76574500  |
| O | 1.38894200  | 1.96814100  | -0.66188200 |
| H | 0.55077100  | 1.48071600  | -0.77430300 |
| H | 1.14638000  | 2.89976900  | -0.72531100 |

#### W5\_9 (B3LYP)

|   |             |             |             |
|---|-------------|-------------|-------------|
| H | 2.44950800  | -1.19653700 | 1.02628900  |
| O | 2.16295800  | -0.85668900 | 0.17371400  |
| H | 1.38571100  | -1.40411600 | -0.07851100 |
| H | -3.10068300 | -0.64446000 | 0.38313700  |
| O | -2.14343900 | -0.59338500 | 0.44494600  |
| H | -1.89571300 | 0.33872000  | 0.24110200  |
| H | -0.92871800 | -1.71881400 | -0.14358200 |
| O | -0.13418600 | -2.21175300 | -0.44796200 |
| H | -0.33987700 | -3.14747800 | -0.38057900 |
| H | 2.03806400  | 2.33651400  | 0.43257600  |
| O | 1.44106000  | 1.77856300  | -0.07280400 |
| H | 1.76645400  | 0.85408100  | 0.02189700  |
| H | -0.29605700 | 1.93002900  | -0.07420200 |
| O | -1.27802500 | 1.92814000  | -0.14904200 |
| H | -1.46563800 | 2.29305300  | -1.01894300 |

#### W5\_10 (B3LYP)

|   |             |             |             |
|---|-------------|-------------|-------------|
| O | -3.89183300 | 0.05842700  | 0.15793300  |
| O | -1.04143900 | -0.16542700 | 0.46990300  |
| O | 2.88631400  | -0.36769200 | 0.94779600  |
| O | 1.03465500  | -1.09948700 | -1.18767900 |
| O | 1.20762900  | 1.50226000  | -0.43959600 |
| H | -4.27197700 | -0.35314600 | -0.62514300 |
| H | -4.43885300 | -0.22820900 | 0.89658600  |
| H | -0.63246800 | 0.70582500  | 0.37036900  |
| H | -1.99857900 | -0.04037800 | 0.36787600  |

|   |            |             |             |
|---|------------|-------------|-------------|
| H | 2.75948200 | -0.49292400 | 1.89272600  |
| H | 2.45586000 | 0.47703700  | 0.73224200  |
| H | 1.72781500 | -1.30412600 | -0.53998700 |
| H | 0.20786200 | -1.10762200 | -0.67107000 |
| H | 1.44260400 | 2.23335900  | -1.01812700 |
| H | 1.18563800 | 0.68554700  | -0.99232700 |

#### W5\_11 (B3LYP)

|   |             |             |             |
|---|-------------|-------------|-------------|
| O | -1.18430600 | -0.07057500 | 0.85310700  |
| H | -2.04073900 | -0.37186800 | 0.51228700  |
| H | -1.14918900 | 0.88859000  | 0.69908600  |
| O | -0.15117800 | 2.40914300  | -0.12429500 |
| H | 0.32410800  | 3.10675900  | 0.33467700  |
| H | 0.52347800  | 1.75565300  | -0.40309900 |
| O | 1.17411500  | 0.04091300  | -0.63245800 |
| H | 1.98591300  | -0.37515400 | -0.30641500 |
| H | 0.43379300  | -0.31845900 | -0.10682200 |
| O | 3.69677200  | -1.17342500 | 0.15883200  |
| H | 4.25835200  | -1.41780200 | -0.58390300 |
| H | 4.28009900  | -0.76429400 | 0.80591800  |
| O | -3.65758100 | -1.11674100 | -0.24685200 |
| H | -3.60249600 | -1.31936000 | -1.18651800 |
| H | -4.03589000 | -1.89859100 | 0.16811400  |

#### W5\_12 (B3LYP)

|   |             |             |             |
|---|-------------|-------------|-------------|
| O | -0.23576400 | 2.33306500  | -0.73455000 |
| H | -0.39219000 | 3.23197300  | -0.43213000 |
| H | -0.87925400 | 1.77095200  | -0.25206400 |
| O | -3.09229800 | -1.69889000 | -0.33711500 |
| H | -3.38004300 | -1.51485800 | -1.23736900 |
| H | -3.89483500 | -1.89259700 | 0.15828500  |
| O | -1.44630800 | 0.40045700  | 0.81147100  |
| H | -1.93840100 | -0.34885300 | 0.44245700  |
| H | -0.52718100 | 0.09988500  | 0.93932900  |
| O | 1.34850600  | 0.40699700  | 0.66587000  |
| H | 2.04050800  | -0.13041100 | 0.25200500  |
| H | 1.16694800  | 1.15095500  | 0.06728800  |
| O | 3.46985700  | -1.29222100 | -0.35458700 |
| H | 4.20229400  | -1.36893200 | 0.26557500  |
| H | 3.25020800  | -2.19337400 | -0.61209200 |

#### W5\_13 (B3LYP)

|   |             |             |             |
|---|-------------|-------------|-------------|
| O | -3.08703900 | -0.78567000 | -0.55911300 |
| H | -3.78700500 | -1.27370300 | -0.11616100 |
| H | -2.25678900 | -1.00667700 | -0.08804100 |
| O | 2.00033700  | -1.25372000 | -0.09310500 |
| H | 2.04497100  | -1.63122300 | -0.97947500 |
| H | 2.39975500  | -1.91083400 | 0.48897400  |
| O | -0.70585900 | -0.57472100 | 0.80378600  |
| H | 0.19432400  | -0.74269400 | 0.48896600  |

|   |             |            |             |
|---|-------------|------------|-------------|
| H | -0.86391000 | 0.38061000 | 0.71254800  |
| O | -2.15494300 | 1.75762800 | 0.10890100  |
| H | -2.13392500 | 2.45719300 | -0.54959000 |
| H | -2.72423300 | 1.05220700 | -0.25407700 |
| O | 3.97331900  | 0.92632600 | -0.22745000 |
| H | 3.21135800  | 0.34187700 | -0.10720400 |
| H | 3.70893700  | 1.77449700 | 0.13990900  |

\*\*\*\*\*

### W6\_1 (MP2)

|   |             |             |             |
|---|-------------|-------------|-------------|
| O | -0.12527400 | -1.54786500 | 0.89586200  |
| H | -0.96988900 | -1.51995500 | 0.37758500  |
| H | -0.28596600 | -2.16847100 | 1.61727500  |
| O | 0.03469500  | 1.37663800  | 0.95362200  |
| H | 0.05664000  | 0.42501800  | 1.15641100  |
| H | 0.88256700  | 1.52845600  | 0.48532700  |
| O | 2.46509200  | 1.40024600  | -0.44915800 |
| H | 2.53274300  | 0.42307900  | -0.51317100 |
| H | 3.28420100  | 1.67690100  | -0.02025100 |
| O | 2.30782600  | -1.37655800 | -0.44903200 |
| H | 1.44364500  | -1.55164600 | -0.01999700 |
| H | 2.29032400  | -1.88857500 | -1.26671400 |
| O | -2.41664400 | -1.20396100 | -0.48108600 |
| H | -2.47878200 | -0.21634700 | -0.51424600 |
| H | -2.51701000 | -1.49008500 | -1.39723700 |
| O | -2.25926300 | 1.49319700  | -0.46276300 |
| H | -1.40867400 | 1.57742500  | 0.03937600  |
| H | -2.88125200 | 2.07062500  | -0.00392500 |

### W6\_2 (MP2)

|   |             |             |             |
|---|-------------|-------------|-------------|
| O | -0.69345600 | 0.51870600  | 1.66723400  |
| H | -0.19010200 | 1.11122900  | 1.07936000  |
| H | -0.27855300 | -0.34643400 | 1.50036700  |
| O | -0.74465300 | -0.42607300 | -1.65419600 |
| H | -0.27044200 | 0.41700300  | -1.53681700 |
| H | -1.61974200 | -0.25260700 | -1.24880000 |
| O | 0.86495700  | 1.70447400  | -0.50112100 |
| H | 1.69327800  | 1.19982900  | -0.32403100 |
| H | 1.14894800  | 2.58252800  | -0.78279100 |
| O | 0.58225200  | -1.73403700 | 0.26768300  |
| H | 0.49234500  | -2.69417000 | 0.23282400  |
| H | 0.06082300  | -1.38463200 | -0.50737300 |
| O | 2.81085000  | -0.11823800 | 0.08350500  |
| H | 2.15364400  | -0.84026200 | 0.19661800  |
| H | 3.29271600  | -0.08692400 | 0.91954500  |
| O | -2.89254400 | -0.01346100 | 0.07849300  |
| H | -2.25151200 | 0.26784400  | 0.77003000  |
| H | -3.65065500 | 0.57562200  | 0.16828600  |

### W6\_3 (MP2)

|   |             |             |             |
|---|-------------|-------------|-------------|
| O | 1.45528800  | -0.19779300 | -1.46655400 |
| H | 0.55046500  | -0.60804900 | -1.56934400 |
| H | 1.93799300  | -0.41302800 | -2.27360200 |
| O | 0.57920300  | 2.02967300  | 0.10453800  |
| H | 1.02165900  | 1.62513700  | 0.86825500  |
| H | 0.94737600  | 1.50918900  | -0.63391500 |
| O | -1.99036600 | 1.07307000  | 0.16292100  |
| H | -1.12768800 | 1.55196900  | 0.16012500  |
| H | -2.66277500 | 1.75471200  | 0.28160800  |
| O | 1.78954000  | -0.39687100 | 1.27839600  |
| H | 1.89781200  | -0.49727600 | 0.30897500  |
| H | 2.56350000  | -0.81794900 | 1.67231700  |
| O | -1.01958600 | -1.17877700 | -1.42312700 |
| H | -1.00724000 | -1.52523700 | -0.50304100 |
| H | -1.58555900 | -0.39546900 | -1.30986700 |
| O | -0.94770500 | -1.39379000 | 1.36326200  |
| H | -1.43763800 | -0.55416200 | 1.31396900  |
| H | -0.02889400 | -1.11393300 | 1.52903600  |

#### W6\_4 (MP2)

|   |             |             |             |
|---|-------------|-------------|-------------|
| O | -2.73499000 | 0.37759000  | -0.27793300 |
| H | -2.31930600 | -0.51373700 | -0.34442600 |
| H | -3.04994800 | 0.56709000  | -1.17037200 |
| O | 2.73511500  | -0.37816800 | -0.27839800 |
| H | 3.05077600  | -0.56718300 | -1.17068300 |
| H | 2.31955700  | 0.51319800  | -0.34467200 |
| O | 1.48648200  | 2.03935200  | -0.45295200 |
| H | 0.60809000  | 2.11564100  | -0.01170500 |
| H | 1.92079400  | 2.88596200  | -0.29671400 |
| O | -0.97876400 | 2.21831400  | 0.70655000  |
| H | -1.09011400 | 2.17963200  | 1.66392700  |
| H | -1.62513700 | 1.56110300  | 0.35321400  |
| O | -1.48614600 | -2.03962800 | -0.45349500 |
| H | -1.92005400 | -2.88654500 | -0.29781000 |
| H | -0.60798500 | -2.11547200 | -0.01167400 |
| O | 0.97828000  | -2.21765600 | 0.70772400  |
| H | 1.62505200  | -1.56124100 | 0.35377500  |
| H | 1.08845800  | -2.17687100 | 1.66516900  |

#### W6\_5 (MP2)

|   |             |             |             |
|---|-------------|-------------|-------------|
| O | 2.48857100  | -0.66469100 | -0.66873000 |
| H | 2.26880600  | 0.27273900  | -0.45922000 |
| H | 2.41051500  | -0.73061500 | -1.62827400 |
| O | -2.60905500 | 0.58425900  | -0.36604700 |
| H | -2.93710700 | 0.65947300  | -1.27039100 |
| H | -2.30100700 | -0.34917800 | -0.28963900 |
| O | -0.80321100 | 2.47388200  | 0.40771800  |
| H | -1.45382400 | 1.78917600  | 0.12241000  |
| H | -1.10408600 | 2.74558500  | 1.28323900  |
| O | -1.69381000 | -1.97514600 | -0.19951100 |

|   |             |             |             |
|---|-------------|-------------|-------------|
| H | -2.22647900 | -2.70998400 | 0.12609400  |
| H | -0.79358000 | -2.12097400 | 0.17746700  |
| O | 0.84015900  | -2.33500300 | 0.73283200  |
| H | 1.06130700  | -2.18861500 | 1.66050700  |
| H | 1.46021100  | -1.75060700 | 0.23481300  |
| O | 1.83912200  | 1.87025600  | 0.10585300  |
| H | 0.88422600  | 2.09022100  | 0.21625300  |
| H | 2.23682000  | 2.66432800  | -0.27017600 |

#### **W6\_6 (MP2)**

|   |             |             |             |
|---|-------------|-------------|-------------|
| O | -0.99497800 | 1.78567400  | 0.73009500  |
| H | -1.60787700 | 1.01309000  | 0.70186400  |
| H | -0.91676000 | 2.04601600  | -0.19987300 |
| O | 1.49221500  | 0.86608900  | 1.01055700  |
| H | 2.01478100  | 1.38767400  | 1.63207500  |
| H | 0.56541800  | 1.22912200  | 1.06311800  |
| O | -2.37298800 | -0.56107300 | 0.50382800  |
| H | -1.78680300 | -0.94724400 | -0.19541900 |
| H | -3.27597700 | -0.71223900 | 0.20040200  |
| O | -0.50080500 | -1.39990200 | -1.26066700 |
| H | -0.09056300 | -0.58277200 | -1.59874600 |
| H | 0.18407700  | -1.75326700 | -0.65680600 |
| O | 0.82473900  | 1.15350100  | -1.70319600 |
| H | 1.46153800  | 1.30629800  | -2.41252900 |
| H | 1.35651800  | 1.10774100  | -0.88418600 |
| O | 1.47622400  | -1.93158400 | 0.70430000  |
| H | 1.17495600  | -2.40240500 | 1.49165200  |
| H | 1.52543600  | -0.99365600 | 0.97911000  |

#### **W6\_7 (MP2)**

|   |             |             |             |
|---|-------------|-------------|-------------|
| O | -2.70234700 | -0.33436400 | 1.10970700  |
| O | -0.89893500 | -1.67816900 | -0.67976300 |
| O | -1.45646500 | 1.14571000  | -0.94170000 |
| O | 0.70410900  | 2.29809200  | 0.17381500  |
| O | 2.72058000  | 0.49008000  | 0.31175700  |
| O | 1.71484500  | -2.01316600 | 0.01015700  |
| H | -3.66136800 | -0.30654600 | 1.21118100  |
| H | -2.49600700 | 0.34585300  | 0.43922100  |
| H | -1.53986900 | -1.60546400 | 0.05020500  |
| H | -0.96686600 | -0.78849200 | -1.07110000 |
| H | -0.67634800 | 1.61051800  | -0.54316900 |
| H | -1.74319700 | 1.71087900  | -1.66910600 |
| H | 0.60442700  | 2.62082000  | 1.07801200  |
| H | 1.45799300  | 1.65992200  | 0.21844800  |
| H | 2.39158300  | -0.43783800 | 0.22994700  |
| H | 3.44399000  | 0.55227100  | -0.32374300 |
| H | 1.77951000  | -2.66894600 | 0.71453000  |
| H | 0.75184800  | -1.95843700 | -0.20621700 |

#### **W6\_8 (MP2)**

|   |             |             |             |
|---|-------------|-------------|-------------|
| O | 1.09131300  | 2.22632200  | 0.22202200  |
| H | 1.17304400  | 2.61571200  | 1.10097600  |
| H | 1.75049300  | 1.48971300  | 0.20890000  |
| O | 1.36407100  | -2.12392000 | 0.29052700  |
| H | 1.61986600  | -3.00397200 | -0.00953800 |
| H | 0.47282900  | -1.96096100 | -0.10702700 |
| O | 2.84244900  | 0.15445400  | 0.17287700  |
| H | 3.43895000  | 0.10376000  | -0.58376100 |
| H | 2.37662500  | -0.71578100 | 0.19060000  |
| O | -3.03034700 | -0.21186200 | 0.83693600  |
| H | -2.52305300 | 0.52768000  | 0.45031500  |
| H | -3.08115800 | -0.01613100 | 1.78039700  |
| O | -1.04406300 | -1.50671900 | -0.78983300 |
| H | -1.76556800 | -1.47616200 | -0.13577800 |
| H | -1.00080900 | -0.57084400 | -1.05815400 |
| O | -1.28230400 | 1.37107000  | -0.73810600 |
| H | -1.55356500 | 1.99882200  | -1.41889700 |
| H | -0.43660500 | 1.73340600  | -0.37342500 |

#### W6\_9 (MP2)

|   |             |             |             |
|---|-------------|-------------|-------------|
| O | 2.70475700  | 0.08680500  | 0.14269200  |
| H | 3.22390200  | -0.02240600 | 0.94845000  |
| H | 2.23269700  | -0.77212800 | 0.03048400  |
| O | 1.27721400  | 2.38572800  | -0.14248100 |
| H | 1.63140100  | 2.78079500  | -0.94818300 |
| H | 1.78499100  | 1.54736500  | -0.03047700 |
| O | -1.42754000 | 2.29899600  | 0.14239600  |
| H | -1.59267200 | 2.80337200  | 0.94801600  |
| H | -0.44760200 | 2.31967500  | 0.03045200  |
| O | -2.70476600 | -0.08683500 | -0.14250400 |
| H | -3.22402300 | 0.02233700  | -0.94819900 |
| H | -2.23251600 | 0.77205600  | -0.03063800 |
| O | 1.42749400  | -2.29894100 | -0.14281100 |
| H | 1.59269100  | -2.80325600 | -0.94844900 |
| H | 0.44758000  | -2.31966300 | -0.03079700 |
| O | -1.27718800 | -2.38574900 | 0.14272200  |
| H | -1.63109700 | -2.78068100 | 0.94860800  |
| H | -1.78511900 | -1.54749800 | 0.03062200  |

#### W6\_10 (MP2)

|   |             |             |             |
|---|-------------|-------------|-------------|
| O | -0.35895500 | -1.89970700 | -0.12401900 |
| H | -0.68124300 | -1.48273600 | -0.93797600 |
| H | 0.61639800  | -1.76386000 | -0.13762600 |
| O | -2.17950900 | 0.21742500  | -1.31186800 |
| H | -2.44580900 | 0.07806000  | -0.38291500 |
| H | -3.00457300 | 0.29540200  | -1.80641300 |
| O | -1.75104400 | -0.22547000 | 1.40828300  |
| H | -2.08278500 | -0.55588100 | 2.25125800  |
| H | -1.19113600 | -0.95086400 | 1.02282400  |
| O | 2.34054600  | -1.38193900 | -0.02835900 |

|   |             |             |             |
|---|-------------|-------------|-------------|
| H | 2.43901500  | -0.40165700 | -0.05353400 |
| H | 2.94346600  | -1.71089400 | -0.70598300 |
| O | 2.34259300  | 1.35025300  | -0.13291500 |
| H | 1.40022600  | 1.61323900  | -0.00197600 |
| H | 2.84600700  | 1.91913700  | 0.46160500  |
| O | -0.30797100 | 1.92913200  | 0.19443600  |
| H | -0.71227300 | 1.33338400  | 0.85228600  |
| H | -0.81257300 | 1.70911200  | -0.60602200 |

#### W6\_11 (MP2)

|   |             |             |             |
|---|-------------|-------------|-------------|
| O | 1.66344700  | 0.74318300  | -1.12567600 |
| H | 2.43279700  | 0.42063800  | -0.62710500 |
| H | 1.05624200  | -0.01816500 | -1.04551800 |
| O | 0.03874900  | -1.35887500 | -0.09502000 |
| H | -0.41147300 | -0.73822100 | 0.51192100  |
| H | -0.71699700 | -1.77594400 | -0.54149900 |
| O | -1.58714500 | 0.65582900  | 1.06098700  |
| H | -1.76593500 | 0.84819800  | 1.98962800  |
| H | -1.08273200 | 1.43829200  | 0.72220600  |
| O | 2.75148800  | -1.26413400 | 0.66665000  |
| H | 1.86332600  | -1.61943000 | 0.47839500  |
| H | 3.31208100  | -2.03813000 | 0.79563800  |
| O | -2.78789400 | -1.34382300 | -0.57370300 |
| H | -2.64542400 | -0.51965100 | -0.07278000 |
| H | -3.49826900 | -1.14480700 | -1.19504500 |
| O | 0.03912800  | 2.55805300  | 0.06173700  |
| H | 0.71781600  | 1.99529200  | -0.38909100 |
| H | -0.20361900 | 3.23006200  | -0.58655200 |

#### W6\_12 (MP2)

|   |             |             |             |
|---|-------------|-------------|-------------|
| O | 1.28905300  | -1.93158700 | -0.24363000 |
| H | 1.15858200  | -2.43318000 | -1.05776000 |
| H | 0.56116500  | -1.26735200 | -0.23231200 |
| O | -0.47726000 | 0.15970400  | -0.01721700 |
| H | -1.14600600 | 0.34423300  | -0.70523500 |
| H | 0.15436000  | 0.91429200  | -0.01825200 |
| O | 1.60242300  | 1.94075700  | 0.15695800  |
| H | 1.85237100  | 2.62146000  | -0.47948100 |
| H | 2.33256900  | 1.28012500  | 0.12461400  |
| O | -2.94478200 | 0.17214900  | -1.32654900 |
| H | -3.22376100 | 0.01766800  | -0.40097300 |
| H | -3.53172700 | 0.86507400  | -1.65277900 |
| O | 3.37203000  | -0.15999200 | 0.04141800  |
| H | 2.72236700  | -0.89171500 | -0.07139500 |
| H | 3.88608700  | -0.40310900 | 0.82124400  |
| O | -2.83755500 | -0.17755400 | 1.44575300  |
| H | -1.88298600 | -0.09218600 | 1.24696600  |
| H | -2.91429800 | -0.98312500 | 1.97148900  |

#### W6\_13 (MP2)

|   |             |             |             |
|---|-------------|-------------|-------------|
| O | 2.55603500  | 1.46480600  | 0.41670100  |
| O | 2.77948300  | -1.24426600 | -0.29011200 |
| O | 0.03972500  | -1.42110500 | 0.44424700  |
| O | 0.01222600  | 1.00447500  | -0.57000300 |
| O | -2.65790600 | 1.50906300  | -0.02558600 |
| O | -2.75200200 | -1.29287900 | 0.01383600  |
| H | 3.33876500  | 2.00357200  | 0.25331800  |
| H | 2.79988000  | 0.55799500  | 0.13256800  |
| H | 1.84843300  | -1.49182900 | -0.11304300 |
| H | 2.92463800  | -1.49399100 | -1.21138800 |
| H | 0.02643600  | -0.46867400 | 0.12899800  |
| H | 0.10387200  | -1.36378600 | 1.40799500  |
| H | -0.80563700 | 1.47603000  | -0.31781800 |
| H | 0.78082100  | 1.50390400  | -0.23535800 |
| H | -3.15788600 | 1.86407200  | 0.71905700  |
| H | -2.81773100 | 0.54112000  | -0.00076300 |
| H | -1.80327200 | -1.52455100 | 0.09416100  |
| H | -3.05880400 | -1.76462000 | -0.77039900 |

#### W6\_14 (MP2)

|   |             |             |             |
|---|-------------|-------------|-------------|
| O | -2.27270000 | -0.55542100 | 1.27122900  |
| H | -2.55169800 | -1.41588700 | 1.60790400  |
| H | -1.32460600 | -0.48308900 | 1.51470600  |
| O | 2.32325600  | -1.77040900 | -0.15961600 |
| H | 2.90608300  | -2.34960300 | -0.66435200 |
| H | 1.85268200  | -1.23870000 | -0.82741100 |
| O | 0.47361800  | -0.11731900 | 1.41551900  |
| H | 1.15106100  | -0.76789400 | 1.65581900  |
| H | 0.50452200  | -0.14972700 | 0.43065400  |
| O | 0.59005400  | 0.13329300  | -1.34101600 |
| H | 0.78407500  | 1.07597400  | -1.19127800 |
| H | -0.37039000 | 0.09210800  | -1.55199900 |
| O | -2.14459500 | -0.14918300 | -1.46914900 |
| H | -2.31135900 | -0.29525400 | -0.51080000 |
| H | -2.74708700 | 0.56166500  | -1.72051000 |
| O | 0.97413100  | 2.46148900  | 0.25156200  |
| H | 1.60494300  | 3.13635100  | 0.52946800  |
| H | 0.95166900  | 1.81445300  | 0.97956700  |

#### W6\_15 (MP2)

|   |             |             |             |
|---|-------------|-------------|-------------|
| O | -2.52900200 | 0.33864500  | -0.08745300 |
| H | -2.26720200 | -0.17652800 | 0.69987300  |
| H | -2.17644600 | -0.21286100 | -0.81375500 |
| O | 3.75554000  | -0.09210600 | 0.02133300  |
| H | 4.18348900  | 0.00762300  | -0.83924100 |
| H | 4.26974200  | 0.47060000  | 0.61497900  |
| O | -1.00642900 | -1.19322200 | 1.80466900  |
| H | -0.20135700 | -0.85842600 | 1.35739700  |
| H | -0.85752900 | -1.02800500 | 2.74356700  |
| O | -0.85936300 | -1.18293900 | -1.85254600 |



|   |             |             |             |
|---|-------------|-------------|-------------|
| H | -0.92859600 | -2.14304700 | -1.77573900 |
| H | -0.11926700 | -0.94077100 | -1.25776200 |
| O | 0.89643500  | -0.11328400 | 0.06520100  |
| H | 0.56851200  | 0.81446900  | 0.01255300  |
| H | 1.86884200  | -0.06427500 | 0.06590000  |
| O | -0.54965200 | 2.19710200  | 0.03550100  |
| H | -0.63179700 | 2.85530000  | -0.66511100 |
| H | -1.36862100 | 1.64236100  | -0.03628800 |

#### **W6\_16 (MP2)**

|   |             |             |             |
|---|-------------|-------------|-------------|
| O | 0.21969200  | -1.55245500 | -0.40131300 |
| O | 0.52713500  | 0.94479000  | -1.66487000 |
| O | -1.47029200 | 1.50723200  | 0.33448300  |
| O | 0.44933800  | 0.06051000  | 1.89908500  |
| O | 2.75002200  | -0.07281500 | 0.03701200  |
| O | -2.50216600 | -0.94921000 | -0.28827700 |
| H | 0.28417700  | -0.78127700 | -1.00804600 |
| H | 0.25734900  | -1.12385000 | 0.48265400  |
| H | 1.39075300  | 1.08628100  | -1.24559900 |
| H | -0.11038500 | 1.39148200  | -1.07726800 |
| H | -1.99993500 | 0.69448700  | 0.15061500  |
| H | -2.11295300 | 2.22114300  | 0.42572000  |
| H | 1.33739500  | 0.35540200  | 1.64121900  |
| H | -0.14886300 | 0.76127000  | 1.58028100  |
| H | 3.68756000  | -0.29922800 | -0.00657400 |
| H | 2.27852200  | -0.89382000 | -0.19156200 |
| H | -3.02341800 | -1.51941700 | 0.29034900  |
| H | -1.63002600 | -1.39689000 | -0.37074700 |

#### **W6\_17 (MP2)**

|   |             |             |             |
|---|-------------|-------------|-------------|
| O | -3.34417400 | -1.04764900 | 0.01985800  |
| H | -2.36600900 | -1.07223600 | 0.02886300  |
| H | -3.60384400 | -1.62910900 | -0.70534600 |
| O | -0.67651700 | -0.18357900 | 0.04795400  |
| H | -1.14555400 | 0.67222100  | 0.10740300  |
| H | -0.05284400 | -0.20962700 | 0.79476400  |
| O | 3.26496600  | 1.18219700  | -0.25651400 |
| H | 2.89270700  | 0.84707200  | 0.57801500  |
| H | 3.31460300  | 2.13960800  | -0.14911900 |
| O | 1.73867000  | -1.05371800 | -1.27498000 |
| H | 2.28063000  | -0.25269100 | -1.38517100 |
| H | 0.82863500  | -0.70783000 | -1.22704900 |
| O | -2.74996700 | 1.68679000  | -0.08328800 |
| H | -3.26366200 | 0.85405100  | -0.06581100 |
| H | -3.18385100 | 2.26429900  | 0.55644600  |
| O | 1.80458900  | -0.65034800 | 1.41188300  |
| H | 1.89261300  | -1.05221100 | 0.51306600  |
| H | 2.10604000  | -1.32309300 | 2.03463800  |

#### **W6\_18 (MP2)**

|   |             |             |             |
|---|-------------|-------------|-------------|
| O | -1.94314700 | 0.46357200  | 0.89044800  |
| H | -1.04439000 | 0.09024000  | 0.83397500  |
| H | -2.54058500 | -0.26020700 | 0.63290700  |
| O | 2.67469000  | -1.50425800 | -1.05904400 |
| H | 1.83394900  | -1.03013500 | -0.88764500 |
| H | 2.43274600  | -2.43653500 | -1.11302500 |
| O | -3.84776800 | -1.55339700 | 0.06914600  |
| H | -4.20124100 | -1.38090500 | -0.81376400 |
| H | -4.63060300 | -1.62680900 | 0.63100100  |
| O | 0.78338700  | 0.23076700  | 0.02941700  |
| H | 0.46070600  | 1.04021200  | -0.41569500 |
| H | 1.57254800  | 0.49572800  | 0.54029300  |
| O | -0.93096400 | 2.20829000  | -0.98806200 |
| H | -0.97690200 | 3.14303600  | -0.75285000 |
| H | -1.50797700 | 1.75018400  | -0.33729000 |
| O | 3.42885300  | 0.25364100  | 0.99382900  |
| H | 3.46948600  | -0.50479700 | 0.37783000  |
| H | 3.81185500  | -0.06893600 | 1.81838700  |

#### W6\_19 (MP2)

|   |             |             |             |
|---|-------------|-------------|-------------|
| O | 0.18936800  | 0.86209100  | 2.00699500  |
| H | 0.78415900  | 1.17159100  | 1.30023500  |
| H | -0.65808500 | 1.25665000  | 1.75327400  |
| O | 1.48067600  | 1.36235100  | -0.54524500 |
| H | 1.74258000  | 0.42853800  | -0.76469900 |
| H | 2.19411700  | 1.92204300  | -0.87399300 |
| O | -1.27766100 | 1.62548500  | -0.63556500 |
| H | -0.30702600 | 1.63051600  | -0.77873400 |
| H | -1.62307300 | 2.33939800  | -1.18530400 |
| O | 1.82891300  | -1.25132000 | -0.96104100 |
| H | 2.63190600  | -1.76242100 | -0.80304100 |
| H | 1.18444500  | -1.55287600 | -0.26177600 |
| O | -2.30509200 | -0.99330400 | -0.54608800 |
| H | -2.43551500 | -1.36271100 | -1.42829000 |
| H | -2.01315800 | -0.07170800 | -0.70087500 |
| O | -0.00226300 | -1.77512200 | 0.90989600  |
| H | 0.04532900  | -0.97166100 | 1.46639700  |
| H | -0.85720900 | -1.66880400 | 0.44519000  |

#### W6\_20 (MP2)

|   |             |             |             |
|---|-------------|-------------|-------------|
| O | 3.06150500  | -0.32065200 | 0.83545700  |
| H | 2.61234400  | 0.41698600  | 0.38055500  |
| H | 3.28282600  | 0.01763100  | 1.71125400  |
| O | -0.87774900 | 2.29618300  | 0.20041200  |
| H | -0.82860400 | 2.62033100  | 1.10789000  |
| H | -1.60748700 | 1.63030400  | 0.20879100  |
| O | -1.62716000 | -2.07944600 | 0.19283900  |
| H | -0.68012700 | -1.95496400 | -0.06522600 |
| H | -1.94919600 | -2.76926900 | -0.40035100 |
| O | 0.91789000  | -1.60392500 | -0.60481000 |

|   |             |             |             |
|---|-------------|-------------|-------------|
| H | 1.63451300  | -1.60578900 | 0.05305200  |
| H | 0.96457600  | -0.68698700 | -0.93310100 |
| O | 1.37189900  | 1.22228900  | -0.84072900 |
| H | 1.62513000  | 1.75568400  | -1.60388600 |
| H | 0.56426800  | 1.66006600  | -0.47191500 |
| O | -2.79969300 | 0.37335600  | 0.11272400  |
| H | -3.56547100 | 0.35464000  | 0.69884600  |
| H | -2.42631000 | -0.54107100 | 0.14694700  |

#### **W6\_21 (MP2)**

|   |             |             |             |
|---|-------------|-------------|-------------|
| O | -0.27947400 | -1.29233800 | -1.39726100 |
| H | 0.10240700  | -2.12909400 | -1.69207200 |
| H | -0.11853500 | -1.26507700 | -0.43122700 |
| O | -0.72634500 | 1.79284800  | 0.43510800  |
| H | 0.00820900  | 1.73385900  | -0.23055600 |
| H | -0.72157500 | 2.70119100  | 0.75979500  |
| O | -2.77356900 | -0.35507200 | 0.08772400  |
| H | -2.38213800 | -0.76802100 | -0.69737400 |
| H | -2.36175200 | 0.52524100  | 0.08926100  |
| O | 2.54823900  | -0.54082000 | 0.64591000  |
| H | 3.26749200  | -0.48679200 | 1.28651100  |
| H | 1.75443100  | -0.76263100 | 1.16635900  |
| O | -0.13190500 | -0.72846800 | 1.41089500  |
| H | -0.33079400 | 0.22198300  | 1.26143600  |
| H | -1.01656000 | -1.09933900 | 1.55637100  |
| O | 1.25104600  | 1.15167800  | -1.27291800 |
| H | 0.79595600  | 0.38267100  | -1.66344600 |
| H | 1.89892000  | 0.72337700  | -0.68072400 |

#### **W6\_22 (MP2)**

|   |             |             |             |
|---|-------------|-------------|-------------|
| O | -2.95044700 | 0.21303000  | -0.54602200 |
| H | -3.82978400 | 0.45608500  | -0.23221200 |
| H | -2.53835200 | -0.29245900 | 0.18845400  |
| O | -1.08921400 | -0.70437600 | 1.28447500  |
| H | -0.66002600 | 0.06185500  | 0.86733500  |
| H | -0.53395300 | -1.44902100 | 0.97606900  |
| O | 1.80677500  | 1.64764000  | 0.97049700  |
| H | 1.68916100  | 1.36359800  | 1.88653500  |
| H | 0.90720900  | 1.86443600  | 0.65678400  |
| O | 1.91469100  | -0.16121600 | -1.09477800 |
| H | 2.07560900  | 0.42903500  | -0.32277800 |
| H | 2.72954000  | -0.13002600 | -1.61132500 |
| O | 0.77933700  | -2.46869000 | 0.07240000  |
| H | 0.47951900  | -3.10388300 | -0.58970500 |
| H | 1.24480400  | -1.77448100 | -0.43724700 |
| O | -0.48035500 | 1.51293500  | -0.60927400 |
| H | -1.42215600 | 1.28211300  | -0.74805200 |
| H | 0.01214200  | 0.97816700  | -1.25225500 |

**W6\_23 (MP2)**

|   |             |             |             |
|---|-------------|-------------|-------------|
| O | 0.50757900  | -1.49317600 | 0.52981400  |
| O | 1.88734700  | 0.68572000  | 1.17674500  |
| O | 0.08893500  | 2.23873200  | -0.33774500 |
| O | -1.43139100 | -0.09464900 | -0.79202400 |
| O | -4.12243200 | -0.35882700 | 0.24574300  |
| O | 3.02211900  | -0.94644300 | -0.87872300 |
| H | -0.24242000 | -1.10409800 | 0.01841600  |
| H | 1.15822600  | -1.75450600 | -0.14263500 |
| H | 1.32633400  | -0.13761200 | 1.10752900  |
| H | 2.04452000  | 0.82133900  | 2.11918700  |
| H | 0.78725800  | 1.82474200  | 0.21076600  |
| H | 0.55570600  | 2.56583300  | -1.11707200 |
| H | -1.05368200 | 0.80071200  | -0.67583000 |
| H | -2.33251500 | -0.05833900 | -0.42773000 |
| H | -4.69726700 | -0.73525700 | -0.43407900 |
| H | -4.11976500 | -1.02243100 | 0.94866500  |
| H | 3.00265500  | -0.27981600 | -0.16906400 |
| H | 3.95369300  | -1.17142900 | -0.98863600 |

**W6\_24 (B3LYP)**

|   |             |             |             |
|---|-------------|-------------|-------------|
| O | 2.94853600  | -0.31096900 | 1.01120700  |
| H | 2.53880500  | 0.45329100  | 0.56841900  |
| H | 3.06095300  | -0.06437700 | 1.93317800  |
| O | -1.02583900 | 2.25619300  | -0.10817200 |
| H | -1.29376900 | 3.07162600  | 0.32276500  |
| H | -1.68743300 | 1.56693600  | 0.13932000  |
| O | -1.56714700 | -2.10662000 | -0.09299500 |
| H | -0.60845700 | -1.97077700 | -0.29171600 |
| H | -1.89774500 | -2.71266600 | -0.76191600 |
| O | 1.01404300  | -1.55106900 | -0.68420800 |
| H | 1.68153600  | -1.58157500 | 0.02047100  |
| H | 1.06044600  | -0.62190900 | -0.96704400 |
| O | 1.42248500  | 1.31279200  | -0.73154900 |
| H | 1.76664100  | 1.81923000  | -1.47337800 |
| H | 0.55784100  | 1.72343800  | -0.48841300 |
| O | -2.75386200 | 0.25085100  | 0.52122100  |
| H | -3.11325100 | 0.13123200  | 1.40485800  |
| H | -2.37130000 | -0.62387700 | 0.26943400  |

**W6\_25 (B3LYP)**

|   |             |             |             |
|---|-------------|-------------|-------------|
| O | -2.33017300 | 0.29779100  | 0.91325100  |
| O | -0.92113500 | 2.31224800  | -0.25462200 |
| O | 1.55269700  | 1.29430000  | -0.70778200 |
| O | 2.43507900  | -0.44518400 | 1.32210800  |
| O | 1.02345000  | -1.59633600 | -0.84422600 |
| O | -1.63237600 | -1.95294900 | -0.43437800 |
| H | -3.26079200 | 0.30746500  | 1.15180100  |
| H | -2.15554600 | -0.56836700 | 0.47581500  |
| H | -1.45419400 | 2.63329600  | -0.98771300 |

|   |             |             |             |
|---|-------------|-------------|-------------|
| H | -1.47137800 | 1.62937300  | 0.19610400  |
| H | 0.67405700  | 1.72592600  | -0.57240500 |
| H | 2.11374700  | 1.94067100  | -1.14642300 |
| H | 2.11985900  | -0.26522100 | 2.21248400  |
| H | 2.20919800  | 0.34057300  | 0.79016200  |
| H | 1.51424100  | -1.54577800 | -0.00374200 |
| H | 1.16662100  | -0.71094400 | -1.21296000 |
| H | -0.66146800 | -1.88851100 | -0.61164600 |
| H | -1.81467800 | -2.87743900 | -0.24628800 |

#### **W6\_26 (B3LYP)**

|   |             |             |             |
|---|-------------|-------------|-------------|
| O | -3.89574900 | -0.06227900 | 0.69564600  |
| O | -1.40184500 | -0.38372300 | -0.75149100 |
| O | -0.16971200 | 2.09962600  | -0.51947500 |
| O | 2.34221700  | 1.61771600  | 0.44730800  |
| O | 2.79582100  | -1.05688400 | 0.27131900  |
| O | 0.43305200  | -2.28878100 | -0.20787400 |
| H | -4.69880800 | 0.05422500  | 0.17754100  |
| H | -3.87964900 | 0.67105700  | 1.31963500  |
| H | -2.24333800 | -0.31970900 | -0.27339600 |
| H | -0.99600800 | 0.50692100  | -0.70578500 |
| H | 0.73088000  | 1.97302400  | -0.14220300 |
| H | -0.04492400 | 2.63257100  | -1.31003800 |
| H | 2.61756900  | 1.89381500  | 1.32591900  |
| H | 2.55042900  | 0.65536800  | 0.38574200  |
| H | 1.94872400  | -1.54208500 | 0.12050300  |
| H | 3.41032000  | -1.38939300 | -0.38917800 |
| H | 0.05404600  | -2.90898800 | 0.42085900  |
| H | -0.27951200 | -1.63221000 | -0.41307400 |

#### **W6\_27 (B3LYP)**

|   |             |             |             |
|---|-------------|-------------|-------------|
| O | -0.78785200 | -1.52454800 | 1.51613000  |
| H | -1.43134600 | -2.23894200 | 1.49282400  |
| H | -0.37415700 | -1.50546200 | 0.63227300  |
| O | 1.01850300  | 1.60151800  | 0.15066400  |
| H | 0.13023200  | 1.58750900  | 0.59889300  |
| H | 1.12547300  | 2.47829700  | -0.23009300 |
| O | 3.10168600  | -0.34230800 | -0.20679800 |
| H | 3.70105600  | -0.62950100 | 0.48766400  |
| H | 2.58801400  | 0.39218900  | 0.16814900  |
| O | -2.27250400 | -0.02956300 | -1.40983100 |
| H | -2.65400000 | 0.19355500  | -2.26333300 |
| H | -1.42679400 | -0.47511200 | -1.58990300 |
| O | 0.37498000  | -0.87103800 | -1.02364100 |
| H | 0.60293300  | 0.04689500  | -0.77247600 |
| H | 1.24609000  | -1.27541700 | -1.14238200 |
| O | -1.45964300 | 1.18322300  | 1.07995200  |
| H | -1.36392200 | 0.30994900  | 1.50496400  |
| H | -1.94494100 | 0.97776800  | 0.26160400  |

**W6\_28 (B3LYP)**

|   |             |             |             |
|---|-------------|-------------|-------------|
| O | 0.51489100  | -1.71664900 | 0.73503200  |
| H | 0.35591000  | -2.65991800 | 0.83791700  |
| H | 0.21177900  | -1.47714800 | -0.16102900 |
| O | 0.64799700  | 1.78585300  | -0.11994500 |
| H | 0.06873400  | 1.51134200  | 0.63957600  |
| H | 0.61727800  | 2.74515000  | -0.17783700 |
| O | 2.94158500  | -0.12828300 | -0.13009500 |
| H | 2.42020900  | -0.79567400 | 0.33566200  |
| H | 2.39730700  | 0.66881500  | -0.06398400 |
| O | -2.74736500 | -0.22674700 | -0.36263200 |
| H | -3.53859400 | 0.11844100  | -0.78523900 |
| H | -2.06053200 | -0.28292300 | -1.05012800 |
| O | -0.24156400 | -0.30898300 | -1.63705100 |
| H | 0.14250400  | 0.52729100  | -1.28733500 |
| H | 0.24423200  | -0.51288300 | -2.44273100 |
| O | -0.94519000 | 0.59705900  | 1.67410000  |
| H | -0.47629700 | -0.25276100 | 1.72343000  |
| H | -1.74535900 | 0.39226900  | 1.15643900  |

**W6\_29 (B3LYP)**

|   |             |             |             |
|---|-------------|-------------|-------------|
| O | 0.12950900  | -1.79606300 | 0.09075700  |
| O | 1.83740600  | 0.12461700  | 0.85701600  |
| O | -0.04815600 | 2.02691200  | 0.01453400  |
| O | -1.72800300 | -0.06584100 | -0.78713200 |
| O | -4.41753400 | -0.07316300 | 0.22583800  |
| O | 4.41328800  | -0.24700600 | -0.40153500 |
| H | -0.62885100 | -1.26649900 | -0.26441300 |
| H | 0.38241300  | -2.41444900 | -0.60094600 |
| H | 1.27496600  | -0.65442900 | 0.60527300  |
| H | 1.99791500  | 0.04044800  | 1.80286900  |
| H | 0.70216300  | 1.49061500  | 0.34200800  |
| H | 0.33051900  | 2.70608800  | -0.55067300 |
| H | -1.29060200 | 0.78096700  | -0.57278200 |
| H | -2.62798000 | -0.02355600 | -0.42585300 |
| H | -5.13105800 | -0.31629300 | -0.37281500 |
| H | -4.61320200 | -0.50836200 | 1.06190300  |
| H | 3.53710900  | -0.07476100 | -0.01700800 |
| H | 4.57453600  | 0.48458500  | -1.00338500 |

**W6\_30 (B3LYP)**

|   |             |             |             |
|---|-------------|-------------|-------------|
| O | 1.24797700  | -1.36887600 | -0.86215200 |
| O | 1.03986600  | 1.45976600  | -0.80599200 |
| O | -1.36338100 | 1.38702700  | 0.85895000  |
| O | -1.09273900 | -1.41387700 | 0.94998700  |
| O | 3.15306400  | 0.07845800  | 0.55962000  |
| O | -2.89455400 | -0.12583800 | -0.82674300 |
| H | 1.03277300  | -0.45052000 | -1.11660700 |
| H | 0.52016400  | -1.62165800 | -0.27446800 |
| H | 1.84736300  | 1.35404500  | -0.27509500 |

|   |             |             |             |
|---|-------------|-------------|-------------|
| H | 0.32817000  | 1.64157300  | -0.17333600 |
| H | -2.03169900 | 1.11637400  | 0.19313800  |
| H | -1.75758100 | 2.08601800  | 1.38953100  |
| H | -1.17655900 | -1.97270300 | 1.72889500  |
| H | -1.02815500 | -0.49397700 | 1.26869400  |
| H | 4.08397700  | -0.05074000 | 0.35798600  |
| H | 2.67123000  | -0.65343300 | 0.12205900  |
| H | -2.44796600 | -0.89418700 | -0.43238900 |
| H | -2.76358800 | -0.19406900 | -1.77776300 |
